# Supplementary material for: Albumin-mediated alteration of plasma zinc speciation by fatty acids modulates blood clotting in type-2 diabetes
Source: Royal Society of Chemistry journal article supplement (doi:10.1039/d0sc06605b), 2021-01-01
Supplement: d0sc06605b1.pdf [file d0sc06605b1.pdf]

## Supplementary Information

### **Albumin-mediated alteration of plasma zinc speciation by fatty acids modulates blood clotting in type-2 diabetes**

Fatty acids increase blood coagulability in type-2 diabetes through altered plasma zinc speciation

Amélie I. S. Sobczak, Kondwani G. H. Katundu, Fladia A. Phoenix, Siavash Khazaipoul, Ruitao Yu, Fanuel Lampiao, Fiona Stefanowicz, Claudia A. Blindauer, Samantha J. Pitt, Terry K. Smith, Ramzi A. Ajjan, and Alan J. Stewart

**Table S1. (Step-wise) stability constants used in speciation modelling.**

**Table S2. Concentrations employed for speciation modelling.**

**Table S3. Fitting parameters used for the fitting of the ITC experiments.**

**Table S4. Fitting results from replicate ITC experiments carried out in the absence of NEFAS.**

**Table S5. Fitting results from ITC experiments.**

**Figure S1. ITC raw data. Full ITC data (including raw data) for the first replicate of  $\text{Zn}^{2+}$  binding to 60  $\mu\text{M}$  HSA in the absence of NEFA.**

**Figure S2. ITC raw data. Full ITC data (including raw data) for the second replicate of  $\text{Zn}^{2+}$  binding to 60  $\mu\text{M}$  HSA in the absence of NEFA.**

**Figure S3. ITC raw data. Full ITC data (including raw data) for the third replicate of  $\text{Zn}^{2+}$  binding to 60  $\mu\text{M}$  HSA in the absence of NEFA.**

**Figure S4. ITC raw data. Full ITC data (including raw data) for the fourth replicate of  $\text{Zn}^{2+}$  binding to 60  $\mu\text{M}$  HSA in the absence of NEFA.**

**Figure S5. ITC raw data. Full ITC data (including raw data) for  $\text{Zn}^{2+}$  binding to 60  $\mu\text{M}$  HSA in the presence of 3 mol. eq. of octanoate.**

**Figure S6. ITC raw data. Full ITC data (including raw data) for  $\text{Zn}^{2+}$  binding to 60  $\mu\text{M}$  HSA in the presence of 4 mol. eq. of octanoate.**

**Figure S7. ITC raw data. Full ITC data (including raw data) for  $\text{Zn}^{2+}$  binding to 60  $\mu\text{M}$  HSA in the presence of 5 mol. eq. of octanoate.**

**Figure S8. ITC raw data. Full ITC data (including raw data) for  $\text{Zn}^{2+}$  binding to 60  $\mu\text{M}$  HSA in the presence of 3 mol. eq. of laurate.**

**Figure S9. ITC raw data. Full ITC data (including raw data) for  $\text{Zn}^{2+}$  binding to 60  $\mu\text{M}$  HSA in the presence of 4 mol. eq. of laurate.**

**Figure S10. ITC raw data. Full ITC data (including raw data) for  $\text{Zn}^{2+}$  binding to 60  $\mu\text{M}$  HSA in the presence of 5 mol. eq. of laurate.**

**Figure S11. ITC raw data. Full ITC data (including raw data) for  $\text{Zn}^{2+}$  binding to 60  $\mu\text{M}$  HSA in the presence of 3 mol. eq. of myristate.**

**Figure S12. ITC raw data. Full ITC data (including raw data) for  $\text{Zn}^{2+}$  binding to 60  $\mu\text{M}$  HSA in the presence of 4 mol. eq. of myristate.**

**Figure S13. ITC raw data. Full ITC data (including raw data) for  $\text{Zn}^{2+}$  binding to 60  $\mu\text{M}$  HSA in the presence of 5 mol. eq. of myristate.**

**Figure S14. ITC raw data. Full ITC data (including raw data) for  $\text{Zn}^{2+}$  binding to 60  $\mu\text{M}$  HSA in the presence of 3 mol. eq. of palmitate.**

**Figure S15. ITC raw data. Full ITC data (including raw data) for  $\text{Zn}^{2+}$  binding to 60  $\mu\text{M}$  HSA in the presence of 4 mol. eq. of palmitate.**

**Figure S16. ITC raw data. Full ITC data (including raw data) for  $\text{Zn}^{2+}$  binding to 60  $\mu\text{M}$  HSA in the presence of 5 mol. eq. of palmitate.**

**Figure S17. ITC raw data. Full ITC data (including raw data) for  $\text{Zn}^{2+}$  binding to 25  $\mu\text{M}$  HSA in the absence of NEFA.**

**Figure S18. ITC raw data. Full ITC data (including raw data) for  $\text{Zn}^{2+}$  binding to 25  $\mu\text{M}$  HSA in the presence of 2.5 mol. eq. of palmitate.**

**Figure S19. ITC raw data. Full ITC data (including raw data) for  $\text{Zn}^{2+}$  binding to 25  $\mu\text{M}$  HSA in the presence of 4 mol. eq. of palmitate.**

**Figure S20. ITC raw data. Full ITC data (including raw data) for  $\text{Zn}^{2+}$  binding to 25  $\mu\text{M}$  HSA in the presence of 5 mol. eq. of palmitate.**

**Figure S21. ITC raw data. Full ITC data (including raw data) for  $\text{Zn}^{2+}$  binding to 25  $\mu\text{M}$  HSA in the presence of 2.5 mol. eq. of stearate.**

**Figure S22. ITC raw data. Full ITC data (including raw data) for  $\text{Zn}^{2+}$  binding to 25  $\mu\text{M}$  HSA in the presence of 4 mol. eq. of stearate.**

**Figure S23. ITC raw data. Full ITC data (including raw data) for  $\text{Zn}^{2+}$  binding to 25  $\mu\text{M}$  HSA in the presence of 5 mol. eq. of stearate.**

**Figure S24. ITC raw data. Full ITC data (including raw data) for  $\text{Zn}^{2+}$  binding to 25  $\mu\text{M}$  HSA in the presence of 2.5 mol. eq. of palmitoleate.**

**Figure S25. ITC raw data. Full ITC data (including raw data) for  $\text{Zn}^{2+}$  binding to 25  $\mu\text{M}$  HSA in the presence of 4 mol. eq. of palmitoleate.**

**Figure S26. ITC raw data. Full ITC data (including raw data) for  $\text{Zn}^{2+}$  binding to 25  $\mu\text{M}$  HSA in the presence of 5 mol. eq. of palmitoleate.**

**Figure S27. Representative raw data from turbidimetric fibrin clotting and lysis assays.**

**Figure S28. Effects of  $\text{Zn}^{2+}$  and NEFAs on fibrin clot parameters in pooled plasma and effects relative to the parameter values in the absence of  $\text{Zn}^{2+}$ .**

**Figure S29. Effects of  $\text{Zn}^{2+}$  and NEFAs on fibrin clot parameters in a purified system and effects relative to the parameter values in the absence of  $\text{Zn}^{2+}$ .**

**Table S6. Demographic information and the results from plasma analysis for the T2DM and control subjects.**

**Figure S30. Comparisons of NEFA, zinc, HSA and fibrinogen concentrations and of platelet count between sexes in plasma samples from individuals with T2DM and controls.**

**Figure S31. Comparison of the clot formation and lysis parameters in plasma samples from patient with T2DM and controls.**

**Figure S32. Comparison of clotting parameters between sexes in plasma samples from patients with T2DM and controls.**

**Figure S33. Representative image from SEM experiments. Purified system, no zinc.**

**Figure S34. Representative image from SEM experiments. Purified system, 18  $\mu\text{M}$  zinc.**

**Figure S35. Representative image from SEM experiments. Controls, no zinc.**

**Figure S36. Representative image from SEM experiments. Controls, 50  $\mu\text{M}$  zinc.**

**Figure S37. Representative image from SEM experiments. T2DM, no zinc.**

**Figure S38. Representative image from SEM experiments. T2DM, 50  $\mu\text{M}$  zinc.**

**Figure S39. Minimum increase in available  $\text{Zn}^{2+}$  concentration upon addition of 4 mol. eq. of myristate to 600  $\mu\text{M}$  HSA, in dependence on total  $\text{Zn}^{2+}$  concentration.**

**Table S1. (Step-wise) stability constants used in speciation modelling.**

| Species              | log K/pKa | Reference                                           |
|----------------------|-----------|-----------------------------------------------------|
| Zn(HSA site A)       | 5.89      | This work                                           |
| Zn(HSA site B)       | 4.16      |                                                     |
| H(Cit)               | 5.51      | S.R. Hurford, C.R. Moris, J.A. Vesey, D, R          |
| H <sub>2</sub> (Cit) | 4.23      | Williams, D. Cummins, P. I. Riley, G. L.            |
| Zn(Cit)              | 4.55      | Christie and J. R. Duffield, <i>J. Inorg.</i>       |
| Zn(Cit) <sub>2</sub> | 2.32      | <i>Biochem.</i> , 1991, <b>42</b> , 273-287.        |
| Ca(Cit)              | 3.364     | C. Blaquiere and G. Berthon, <i>Inorg. Chim.</i>    |
| Ca(Cit) <sub>2</sub> | 1.601     | <i>Acta</i> , 1987, <b>135</b> ,179-189.            |
| Zn(Tris)             | 2.271     | L. Bologni, A. Sabatini and A. Vacca, <i>Inorg.</i> |
| H(Tris)              | 8.11      | <i>Chim. Acta</i> , 1983, <b>69</b> , 71-75.        |

**Table S2. Concentrations employed for speciation modelling.** In  $\mu\text{M}$  unless stated otherwise.

| System                            | Concentrations             |                              |            |                 |          |                  |
|-----------------------------------|----------------------------|------------------------------|------------|-----------------|----------|------------------|
|                                   | $\text{Zn}^{2+}$           | HSA site A                   | HSA site B | Citrate         | Tris     | $\text{Ca}^{2+}$ |
| Platelets in plasma               | 15 or 115                  | 600, 540 or 38 <sup>a)</sup> | 600        | n.a.            | n.a.     | n.a.             |
| Citrated plasma (fibrin clotting) | 2.5, 21.83, 41.17 or 99.17 | 100 or 16.3                  | 100        | 2.07 or 2.45 mM | 41.67 mM | 7.5 mM           |
| Purified system (fibrin clotting) | 0, 20, 40, 100             | 100 or 16.3                  | 100        | n.a.            | 50 mM    | n.a.             |
| Purified system (Fibre thickness) | 18                         | 135                          | 135        | n.a.            | 50 mM    | n.a.             |

<sup>a)</sup> The 540 and 38  $\mu\text{M}$  concentrations are based on the assumption of presence of endogenous NEFAs that reduce site A availability by 10%.

**Table S3. Fitting parameters used for the fitting of the ITC experiments.** ITC data fitting approaches for ITC experiments examining Zn<sup>2+</sup>-binding to HSA in the presence of different NEFAs. The values for K1' and ΔH1 in the fits for experiments conducted in the presence of NEFAs are derived from the fit “no NEFA” (see Table S4). All entries marked “v” signify parameters that were allowed to vary. Results for these varied parameters are given in Table S5.

| Fit                   | Model             | Fixed parameters |                        |                               |      |                        |                               |
|-----------------------|-------------------|------------------|------------------------|-------------------------------|------|------------------------|-------------------------------|
|                       |                   | N1               | K1' (M <sup>-1</sup> ) | ΔH1 (kcal mol <sup>-1</sup> ) | N2   | K2' (M <sup>-1</sup> ) | ΔH2 (kcal mol <sup>-1</sup> ) |
| No NEFA,<br>60 μM HSA | Two sets of sites | v                | v                      | v                             | v    | v                      | v                             |
| Others                | Two sets of sites | v                | 307313                 | -6490                         | 1.00 | v                      | v                             |

**Table S4. Fitting results from replicate ITC experiments carried out in the absence of NEFAS.**

|          | N1    | $K1'$ (M <sup>-1</sup> ) | $\Delta H1$ (kcal mol <sup>-1</sup> ) | N2   | $K2'$ (M <sup>-1</sup> ) | $\Delta H2$ (kcal mol <sup>-1</sup> ) |
|----------|-------|--------------------------|---------------------------------------|------|--------------------------|---------------------------------------|
| Repeat 1 | 0.918 | 369280                   | -6407                                 | 1.00 | 9028                     | -11246                                |
| Repeat 2 | 0.961 | 84639                    | -7347                                 | 1.00 | 7244                     | -10576                                |
| Repeat 3 | 0.862 | 468020                   | -5717                                 | 1.00 | 6001                     | -12566                                |
| Mean     | 0.914 | 307313                   | -6490                                 | 1.00 | 7424                     | -11463                                |
| SD       | 0.040 | 162532                   | 668                                   | 0    | 1242                     | 827                                   |

**Table S5. Fitting results from ITC experiments.**

| Fitted Parameter                | Fit                       | 0 NEFA | 2.5 NEFA | 3 NEFA | 4 NEFA | 5 NEFA |
|---------------------------------|---------------------------|--------|----------|--------|--------|--------|
| N1                              | No NEFA, 60 $\mu$ M HSA   | 0.914  |          |        |        |        |
| K1' ( $M^{-1}$ )                | (average)                 | 307313 |          |        |        |        |
| $\Delta H1$ (kcal mol $^{-1}$ ) |                           | -6490  |          |        |        |        |
| N2                              |                           | 1.00   |          |        |        |        |
| K2' ( $M^{-1}$ )                |                           | 7424   |          |        |        |        |
| $\Delta H2$ (kcal mol $^{-1}$ ) |                           | -11463 |          |        |        |        |
| N1                              | Octanoate                 |        |          | 0.816  | 0.783  | 0.843  |
|                                 | Laurate                   |        |          | 0.836  | 0.191  | 2e-14  |
|                                 | Myristate                 |        |          | 0.468  | 0.163  | 0.000  |
|                                 | Palmitate, 60 $\mu$ M HSA |        |          | 0.438  | 0.000  | 1e-14  |
|                                 | No NEFA, 25 $\mu$ M HSA   | 0.833  |          |        |        |        |
|                                 | Palmitate, 25 $\mu$ M HSA |        | 0.764    |        | 0.054  | 8e-15  |
|                                 | Stearate                  |        | 0.401    |        | 0.075  | 1e-19  |
|                                 | Palmitoleate              |        | 0.976    |        | 0.371  | 2e-14  |
| K2' ( $M^{-1}$ )                | Octanoate                 |        |          | 14390  | 11107  | 12933  |
|                                 | Laurate                   |        |          | 9096   | 10750  | 7817   |
|                                 | Myristate                 |        |          | 11864  | 7490   | 7284   |
|                                 | Palmitate, 60 $\mu$ M HSA |        |          | 12263  | 7557   | 5834   |
|                                 | No NEFA, 25 $\mu$ M HSA   | 13839  |          |        |        |        |
|                                 | Palmitate, 25 $\mu$ M HSA |        | 12540    |        | 7955   | 9658   |
|                                 | Stearate                  |        | 25180    |        | 12386  | 13856  |
|                                 | Palmitoleate              |        | 7911     |        | 17700  | 8180   |
| $\Delta H2$ (kcal mol $^{-1}$ ) | Octanoate                 |        |          | -6975  | -4030  | -5474  |
|                                 | Laurate                   |        |          | -11750 | -15407 | -16053 |
|                                 | Myristate                 |        |          | -9454  | -14122 | -10704 |
|                                 | Palmitate, 60 $\mu$ M HSA |        |          | -11538 | -12743 | -12831 |
|                                 | No NEFA, 25 $\mu$ M HSA   | -12908 |          |        |        |        |
|                                 | Palmitate, 25 $\mu$ M HSA |        | -10551   |        | -20352 | -19791 |
|                                 | Stearate                  |        | -12926   |        | -20565 | -15890 |
|                                 | Palmitoleate              |        | -20315   |        | -14384 | -15458 |

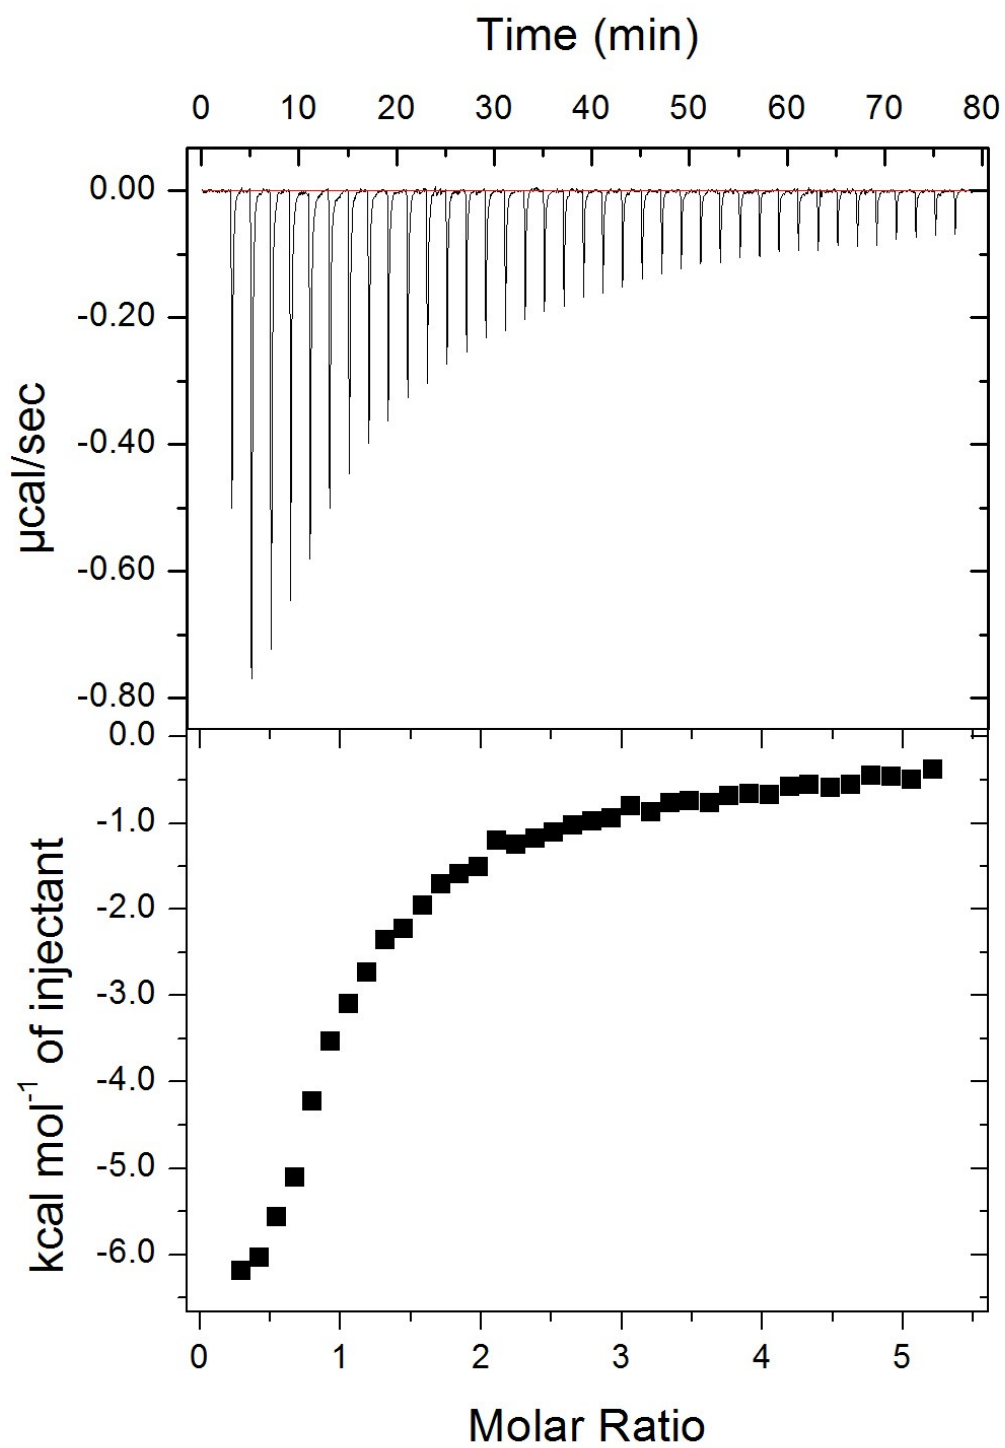

**Figure S1. ITC raw data.** Full ITC data (including raw data) for the first replicate of Zn<sup>2+</sup> binding to 60 μM HSA in the absence of NEFA, corresponding to data shown in Figure 2A-D.

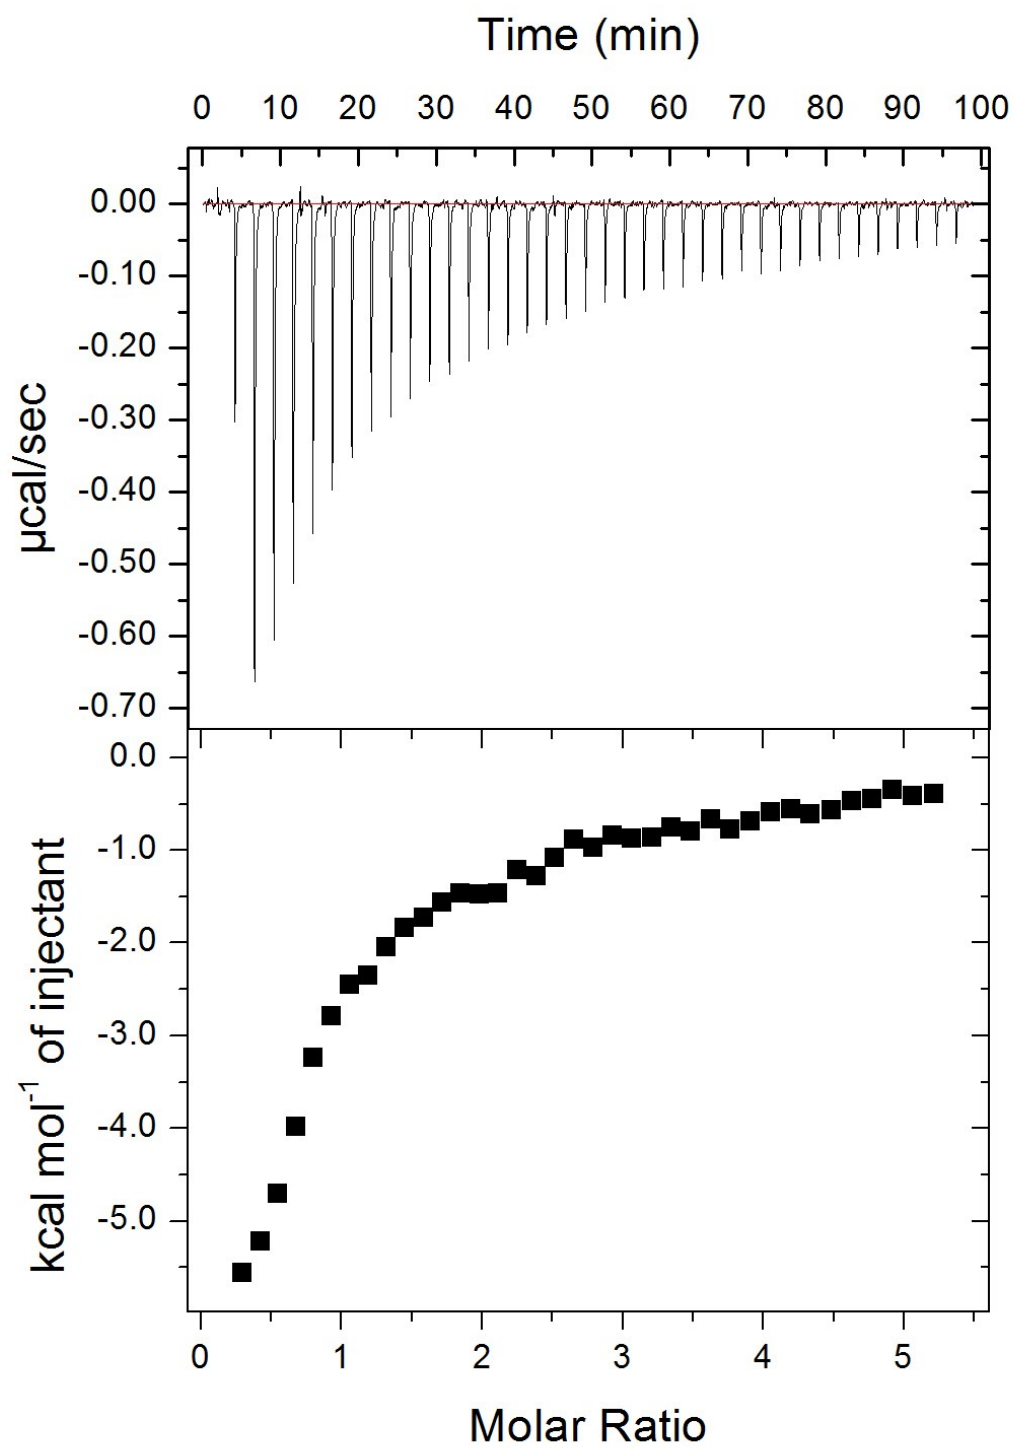

**Figure S2. ITC raw data.** Full ITC data (including raw data) for the second replicate of  $\text{Zn}^{2+}$  binding to 60  $\mu\text{M}$  HSA in the absence of NEFA.

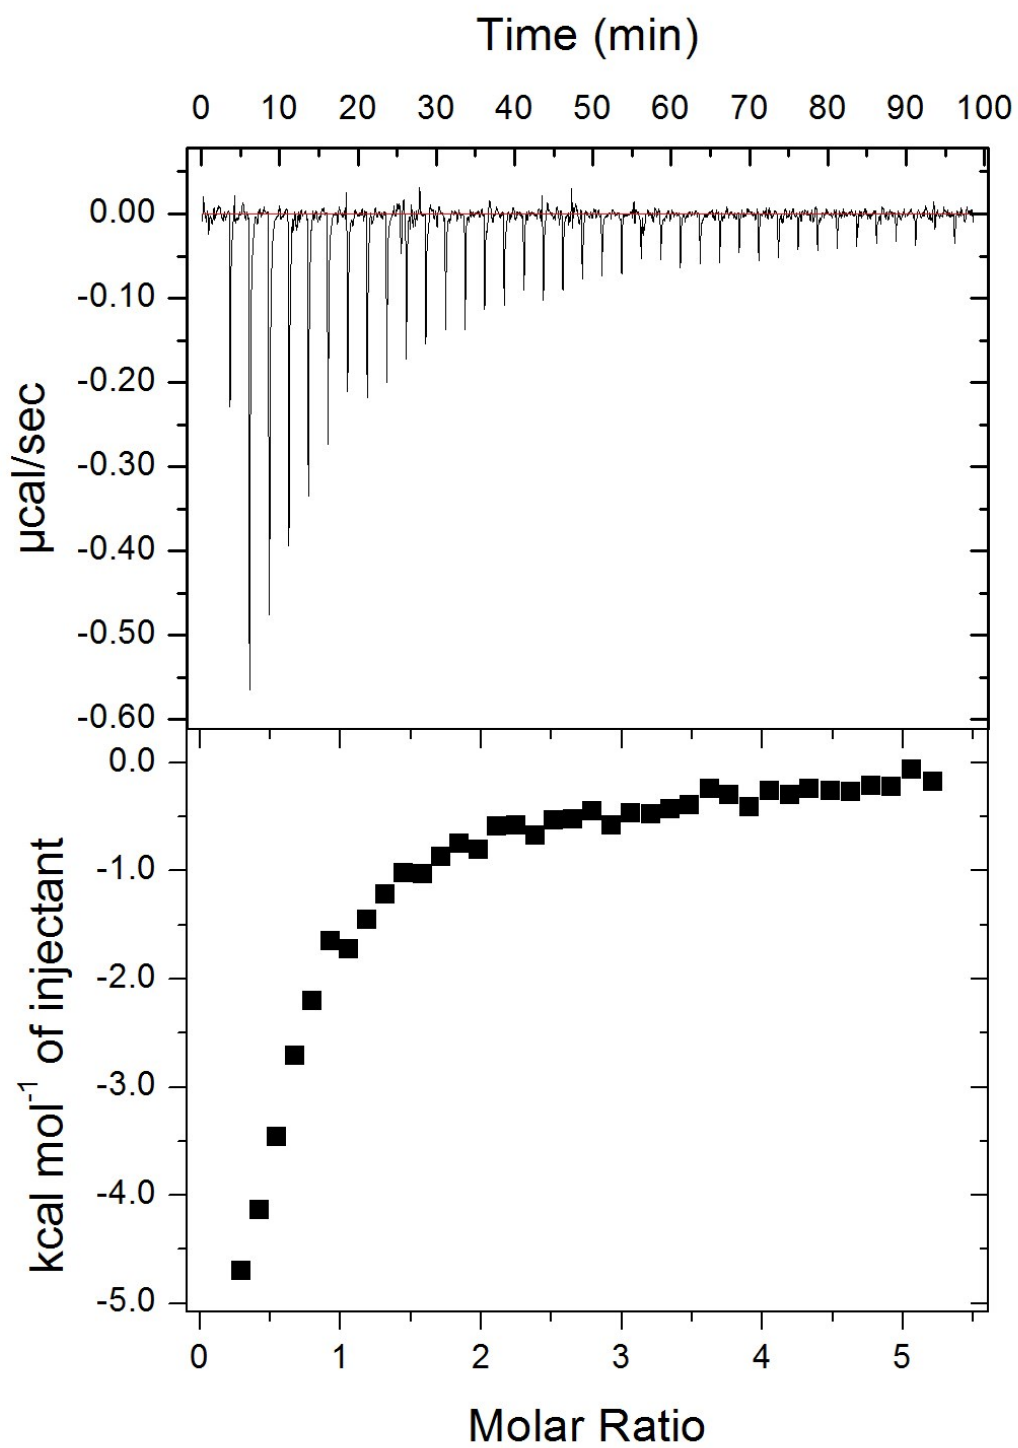

**Figure S3. ITC raw data.** Full ITC data (including raw data) for the third replicate of  $\text{Zn}^{2+}$  binding to 60  $\mu\text{M}$  HSA in the absence of NEFA.

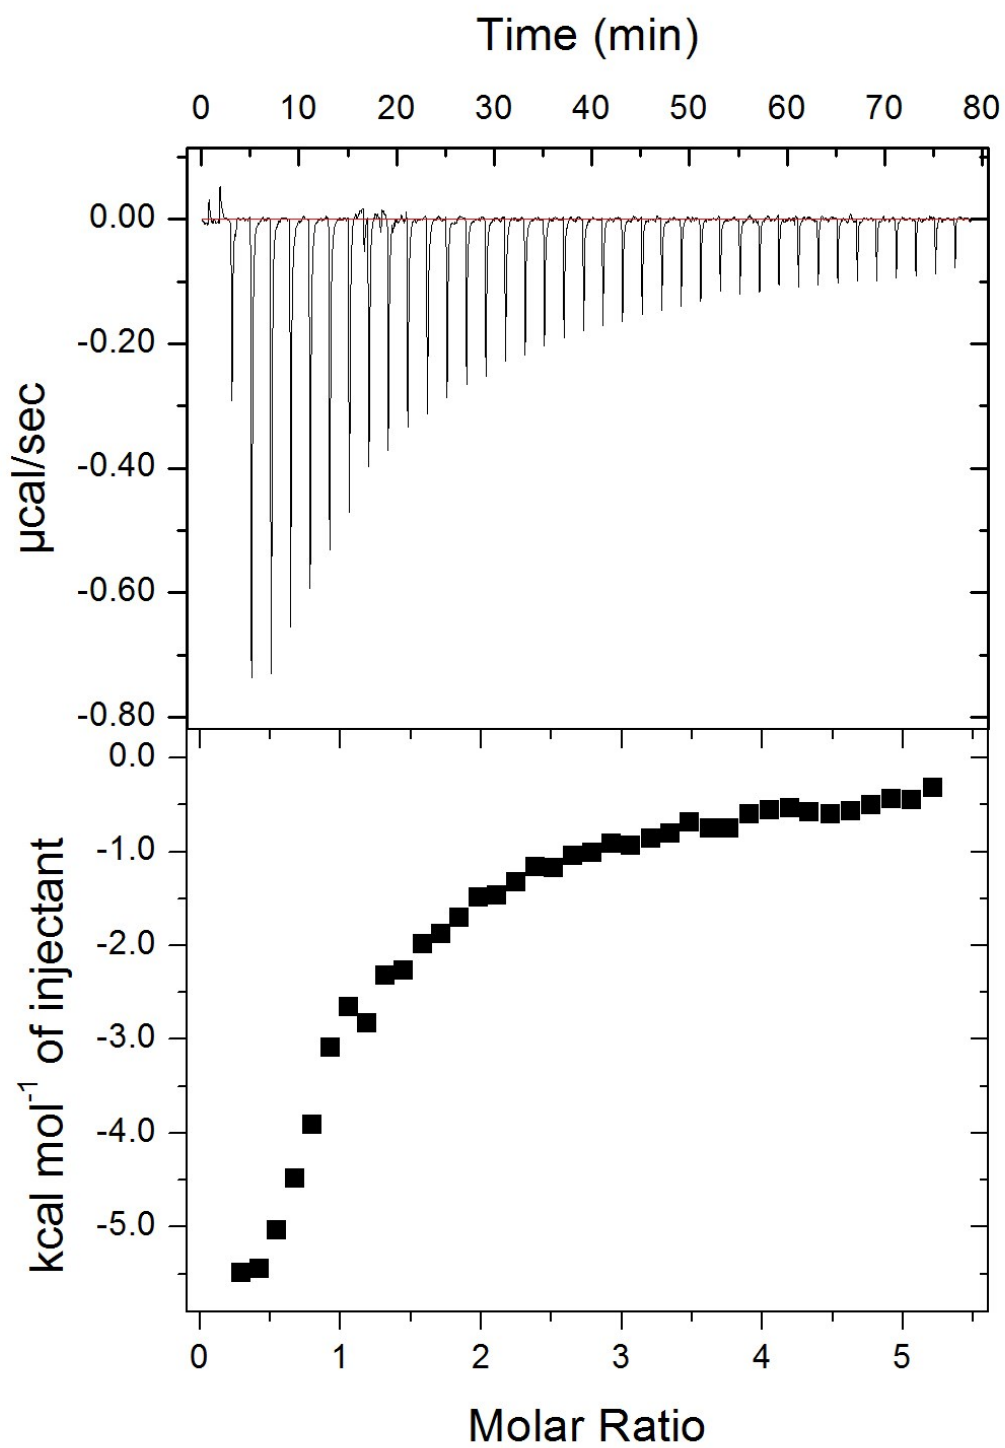

**Figure S4. ITC raw data.** Full ITC data (including raw data) for the fourth replicate of  $\text{Zn}^{2+}$  binding to 60  $\mu\text{M}$  HSA in the absence of NEFA.

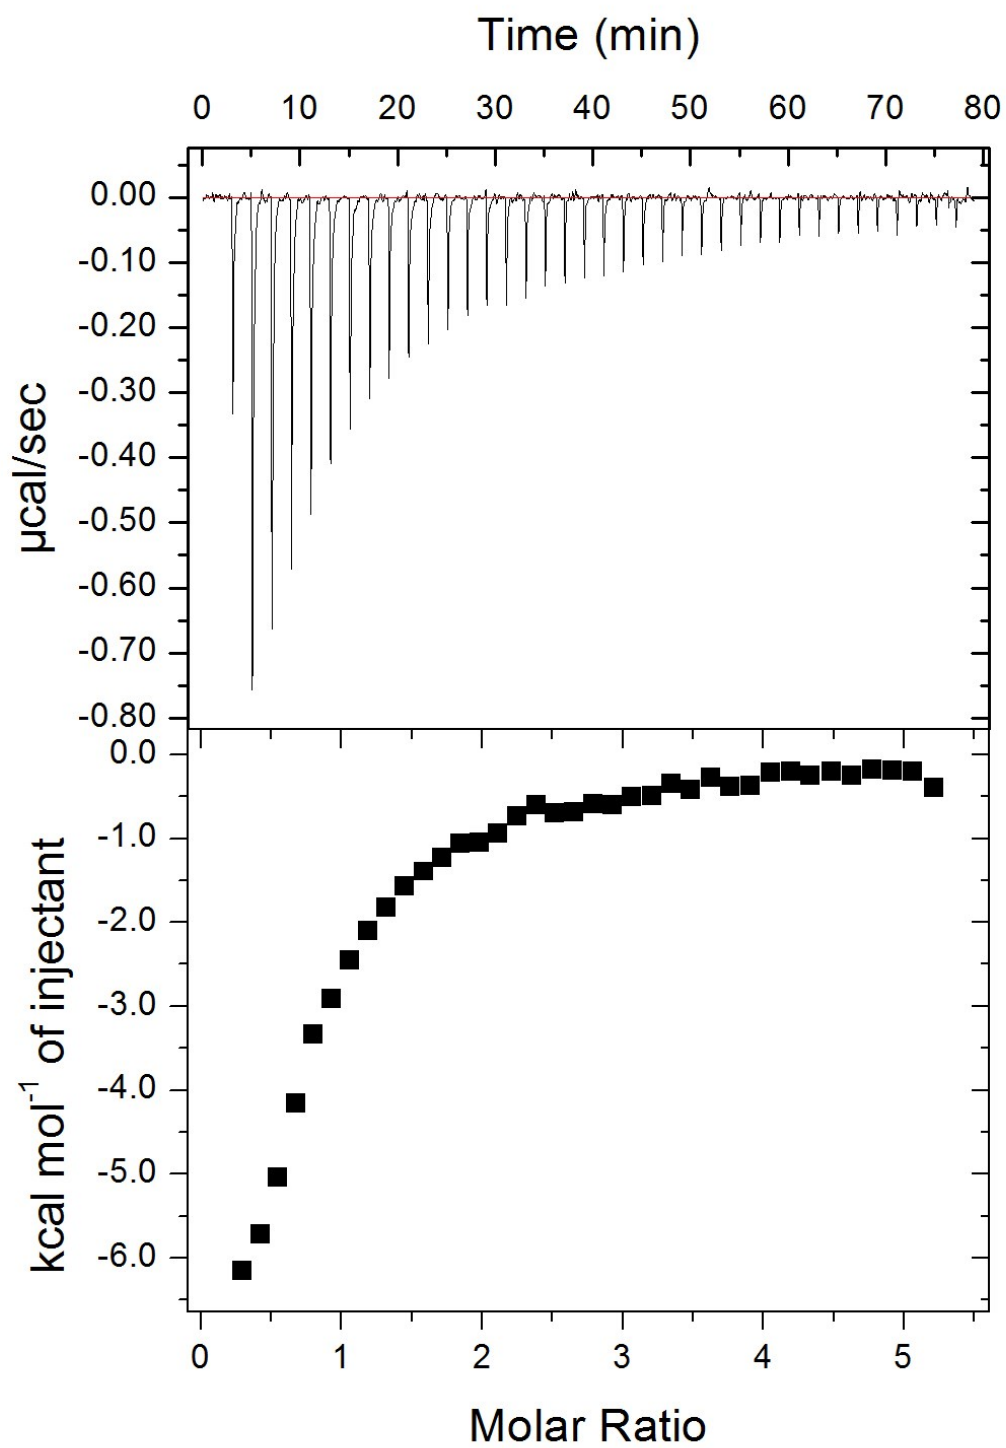

**Figure S5. ITC raw data.** Full ITC data (including raw data) for Zn<sup>2+</sup> binding to 60 μM HSA in the presence of 3 mol. eq. of octanoate, corresponding to data shown in Figure 2A.

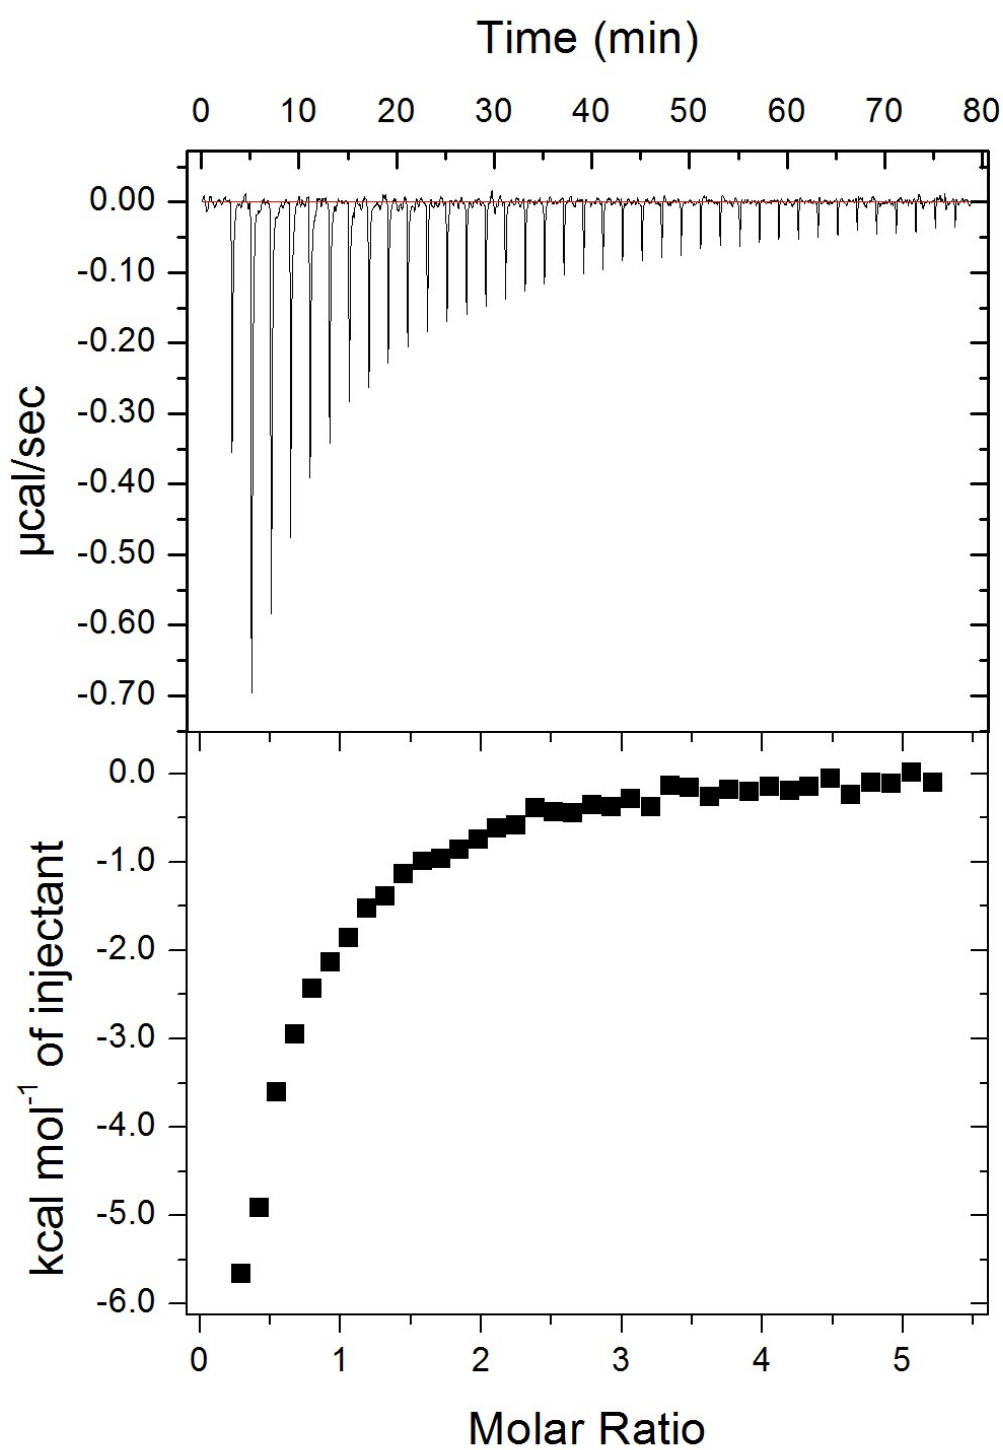

**Figure S6. ITC raw data.** Full ITC data (including raw data) for  $\text{Zn}^{2+}$  binding to 60  $\mu\text{M}$  HSA in the presence of 4 mol. eq. of octanoate.

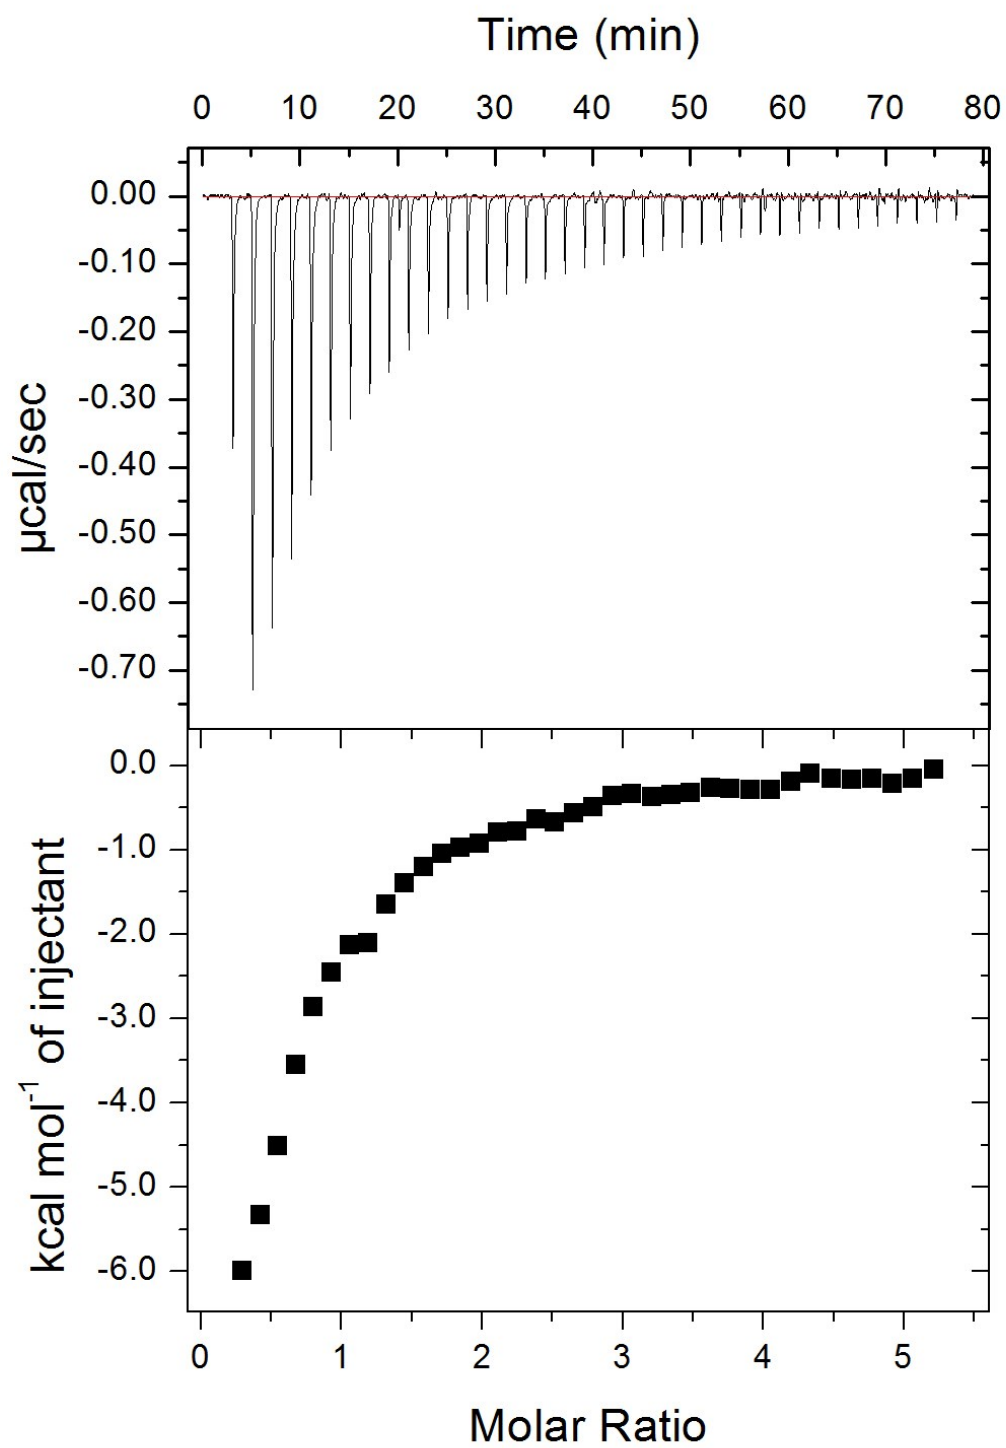

**Figure S7. ITC raw data.** Full ITC data (including raw data) for  $\text{Zn}^{2+}$  binding to 60  $\mu\text{M}$  HSA in the presence of 5 mol. eq. of octanoate, corresponding to data shown in Figure 2A.

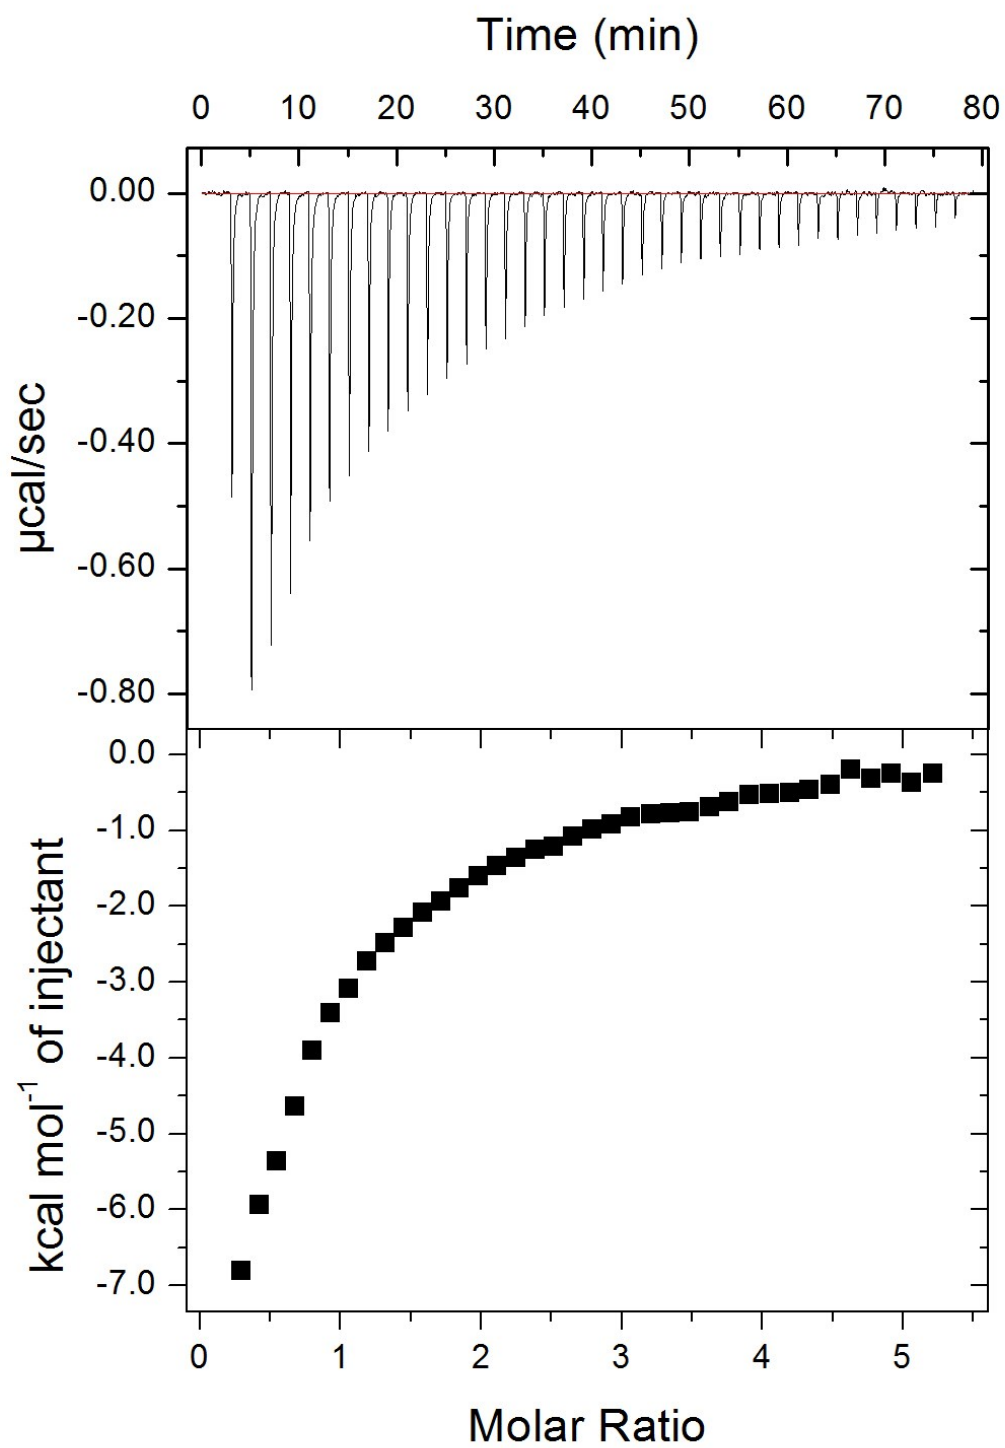

**Figure S8. ITC raw data.** Full ITC data (including raw data) for  $\text{Zn}^{2+}$  binding to 60  $\mu\text{M}$  HSA in the presence of 3 mol. eq. of laurate, corresponding to data shown in Figure 2B.

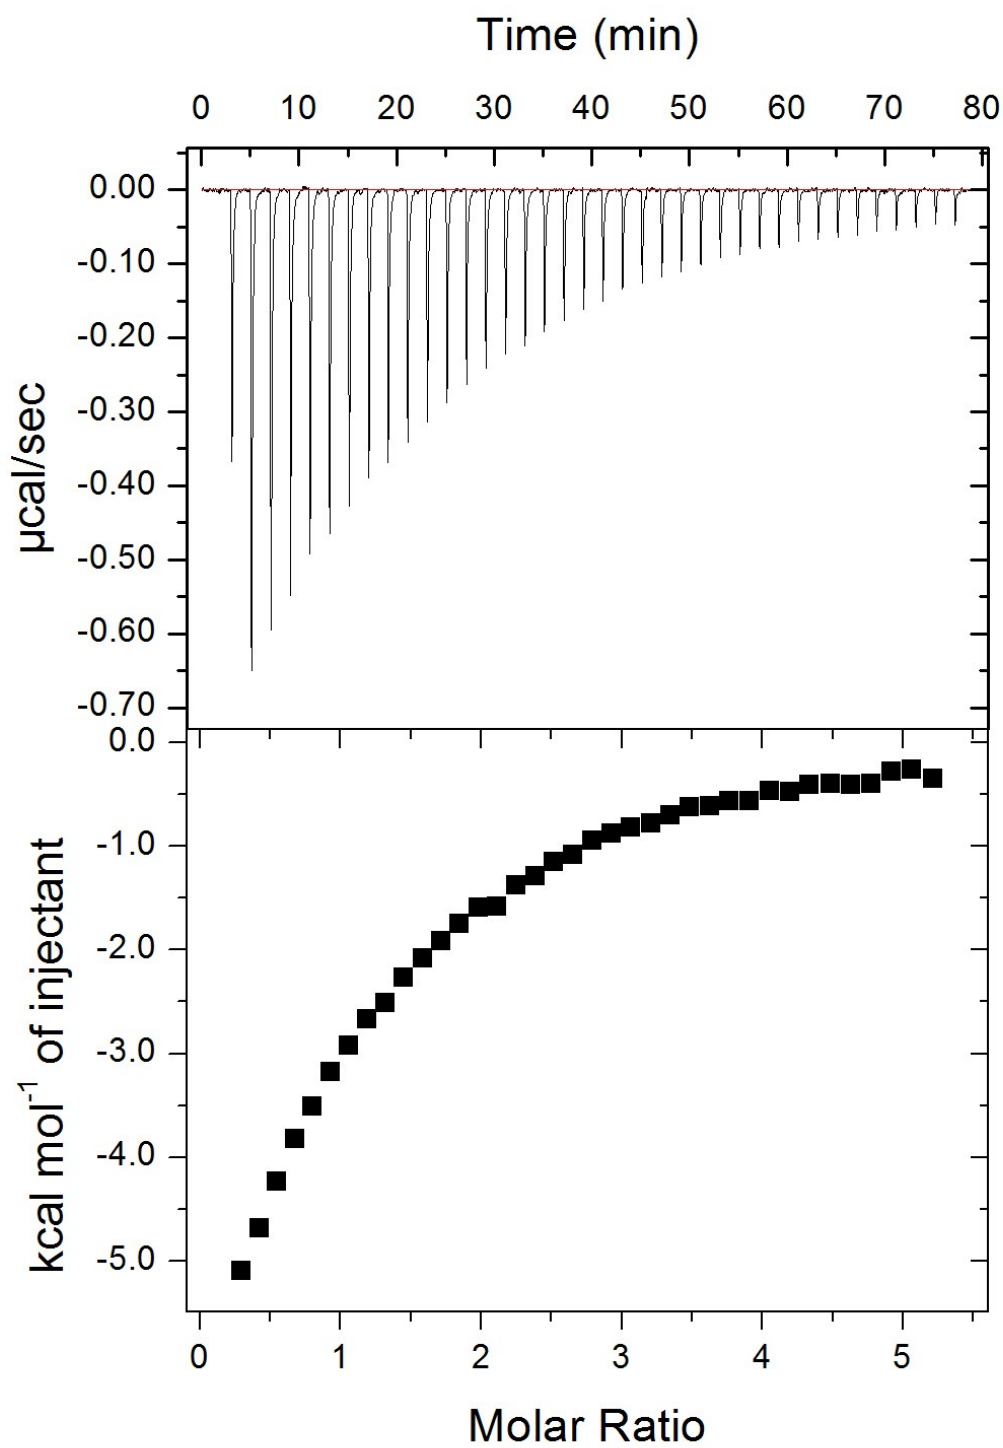

**Figure S9. ITC raw data.** Full ITC data (including raw data) for  $\text{Zn}^{2+}$  binding to 60  $\mu\text{M}$  HSA in the presence of 4 mol. eq. of laurate, corresponding to data shown in Figure 2B.

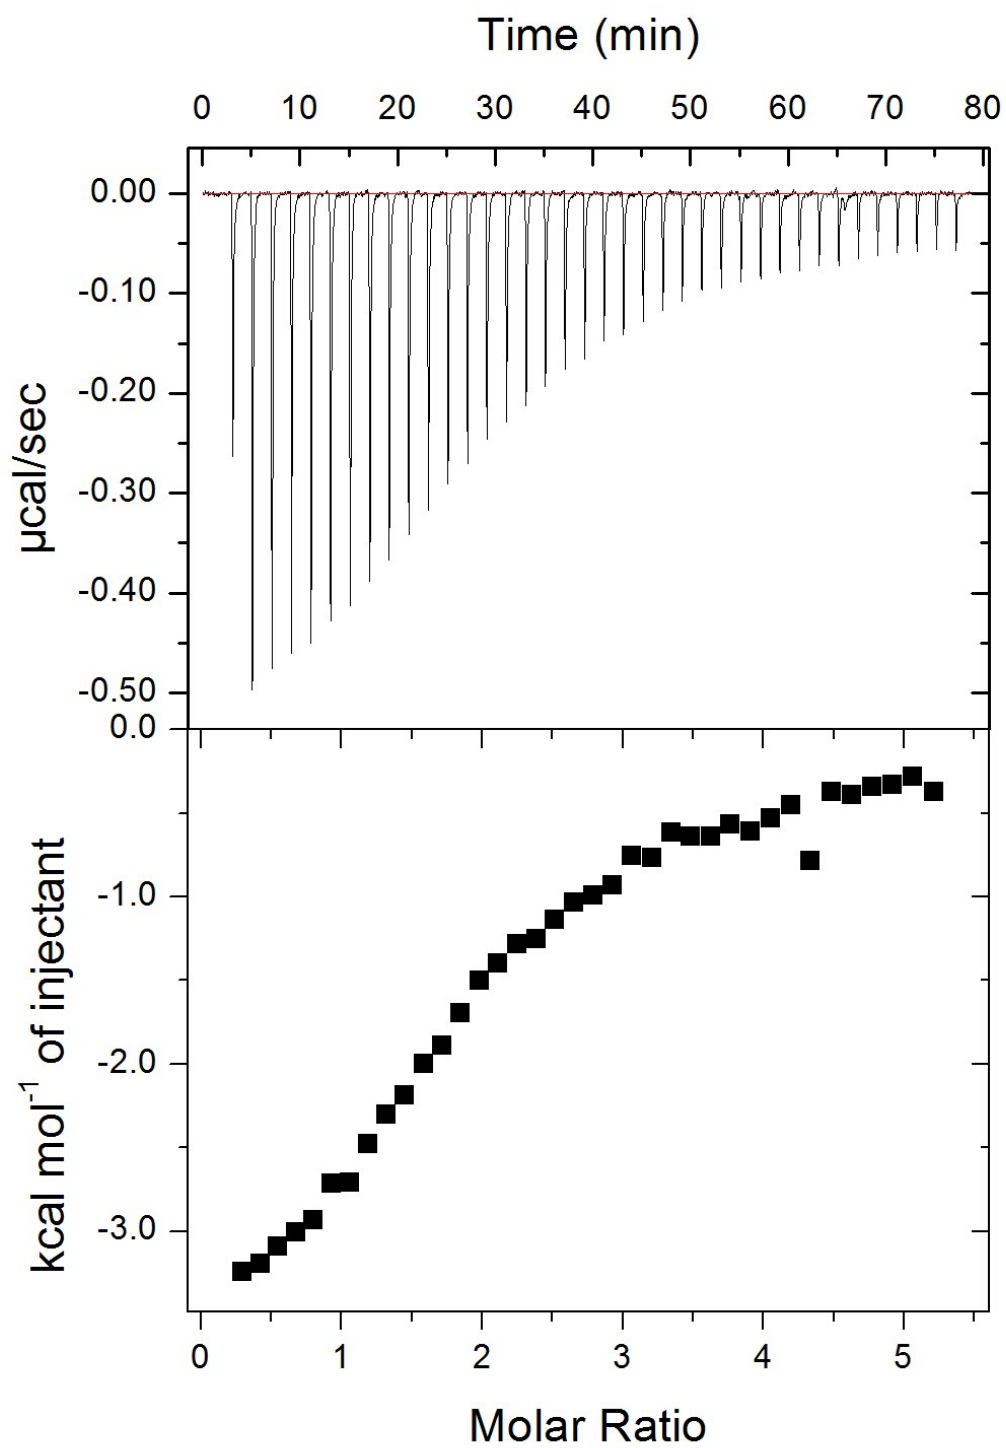

**Figure S10. ITC raw data.** Full ITC data (including raw data) for  $\text{Zn}^{2+}$  binding to 60  $\mu\text{M}$  HSA in the presence of 5 mol. eq. of laurate, corresponding to data shown in Figure 2B.

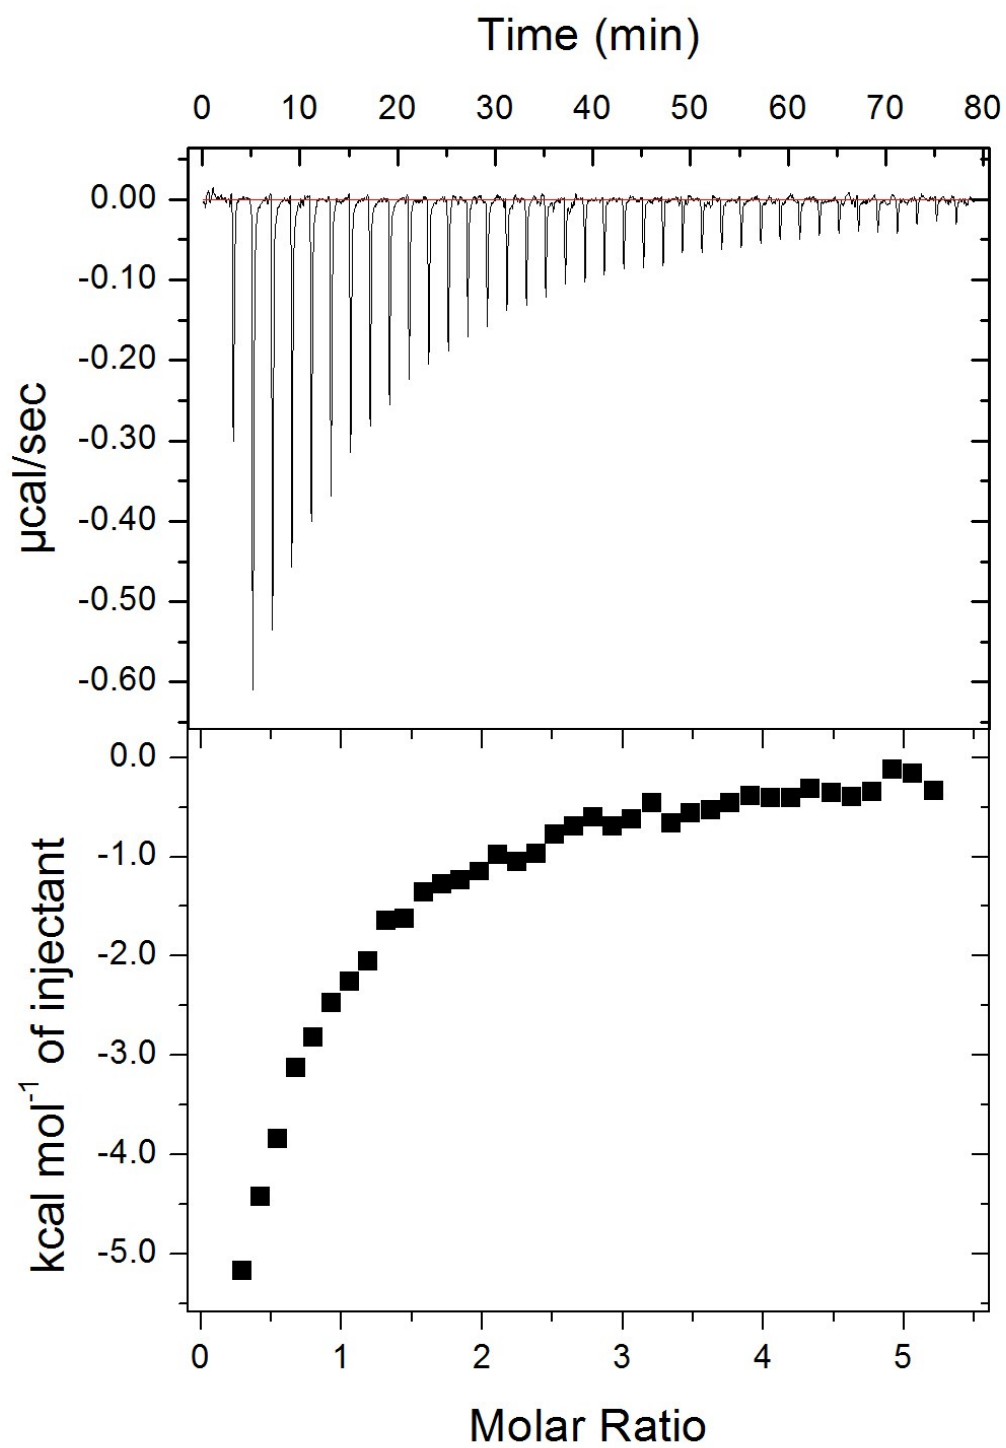

**Figure S11. ITC raw data.** Full ITC data (including raw data) for  $\text{Zn}^{2+}$  binding to 60  $\mu\text{M}$  HSA in the presence of 3 mol. eq. of myristate, corresponding to data shown in Figure 2C.

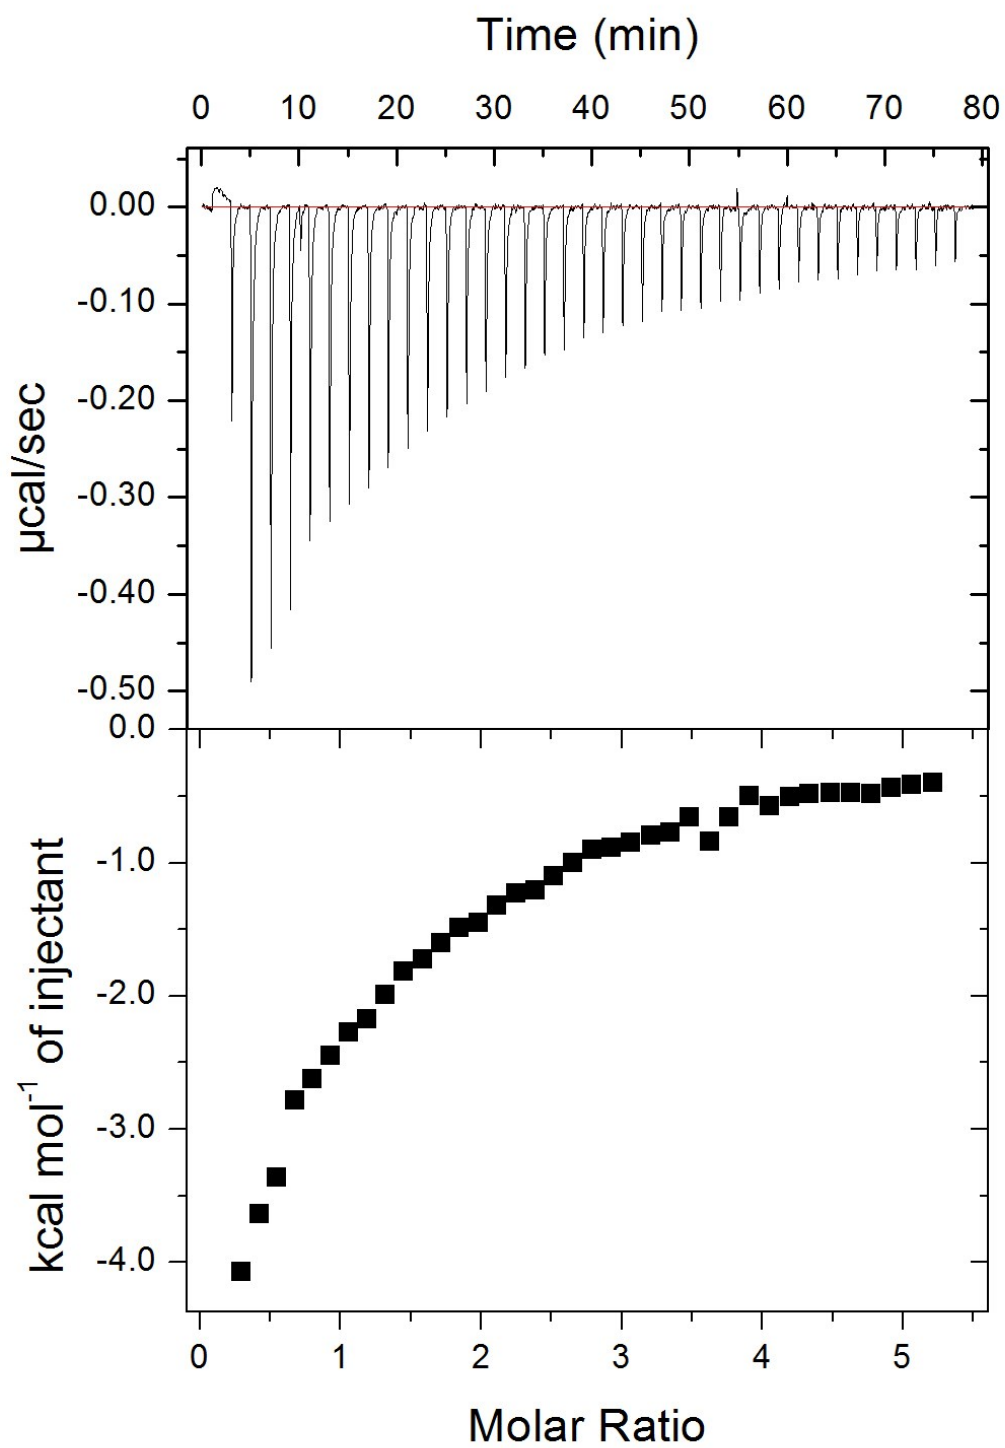

**Figure S12. ITC raw data.** Full ITC data (including raw data) for  $\text{Zn}^{2+}$  binding to 60  $\mu\text{M}$  HSA in the presence of 4 mol. eq. of myristate, corresponding to data shown in Figure 2C.

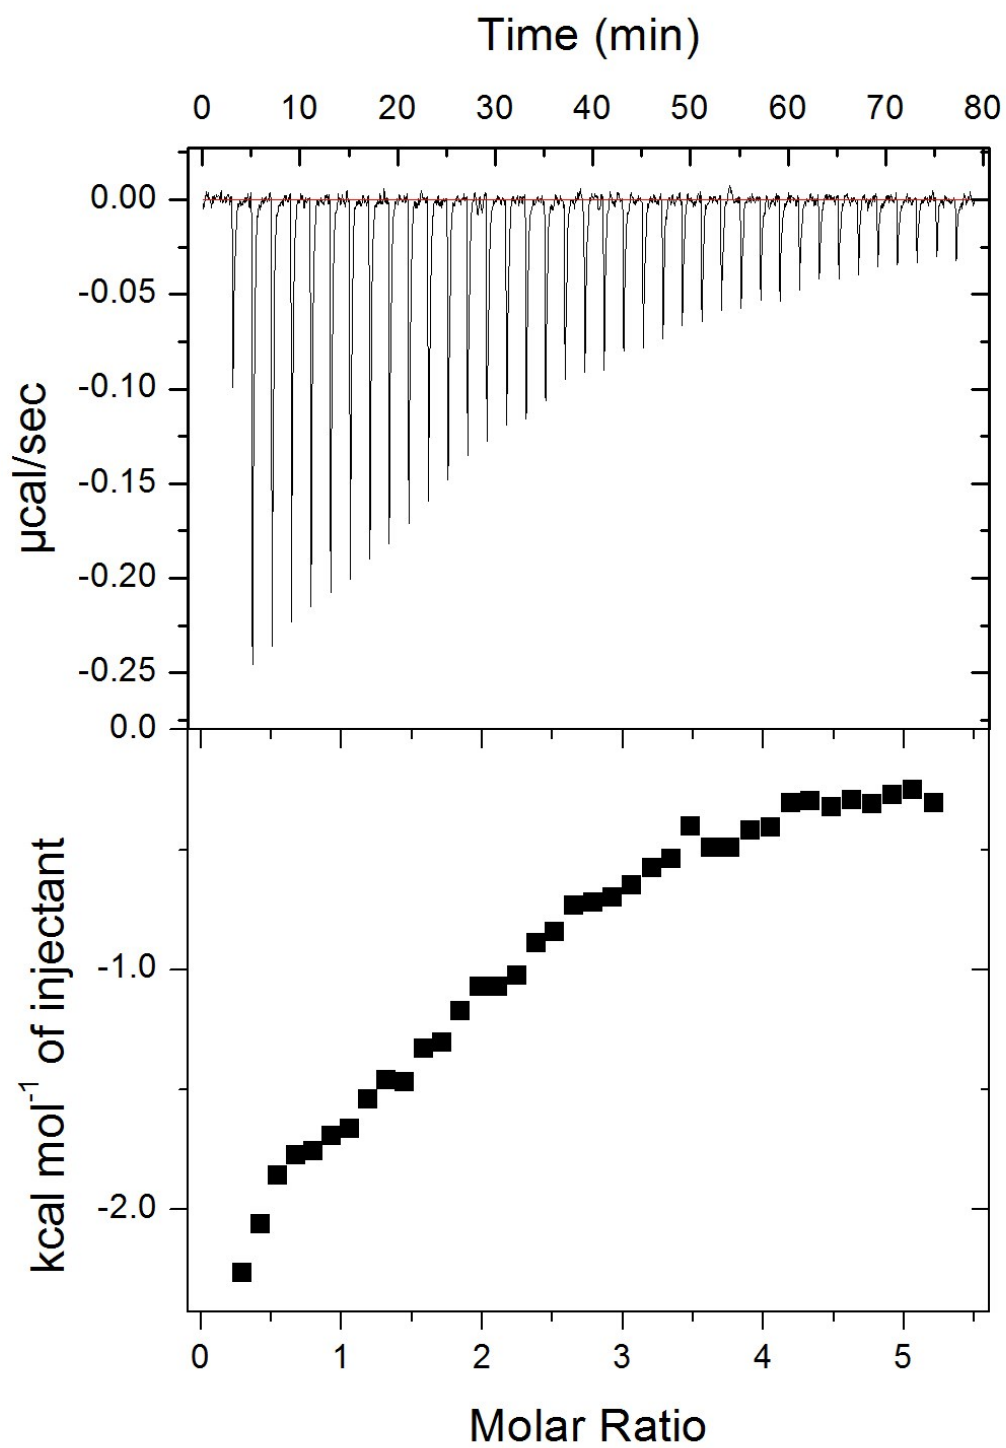

**Figure S13. ITC raw data.** Full ITC data (including raw data) for  $\text{Zn}^{2+}$  binding to 60  $\mu\text{M}$  HSA in the presence of 5 mol. eq. of myristate, corresponding to data shown in Figure 2C.

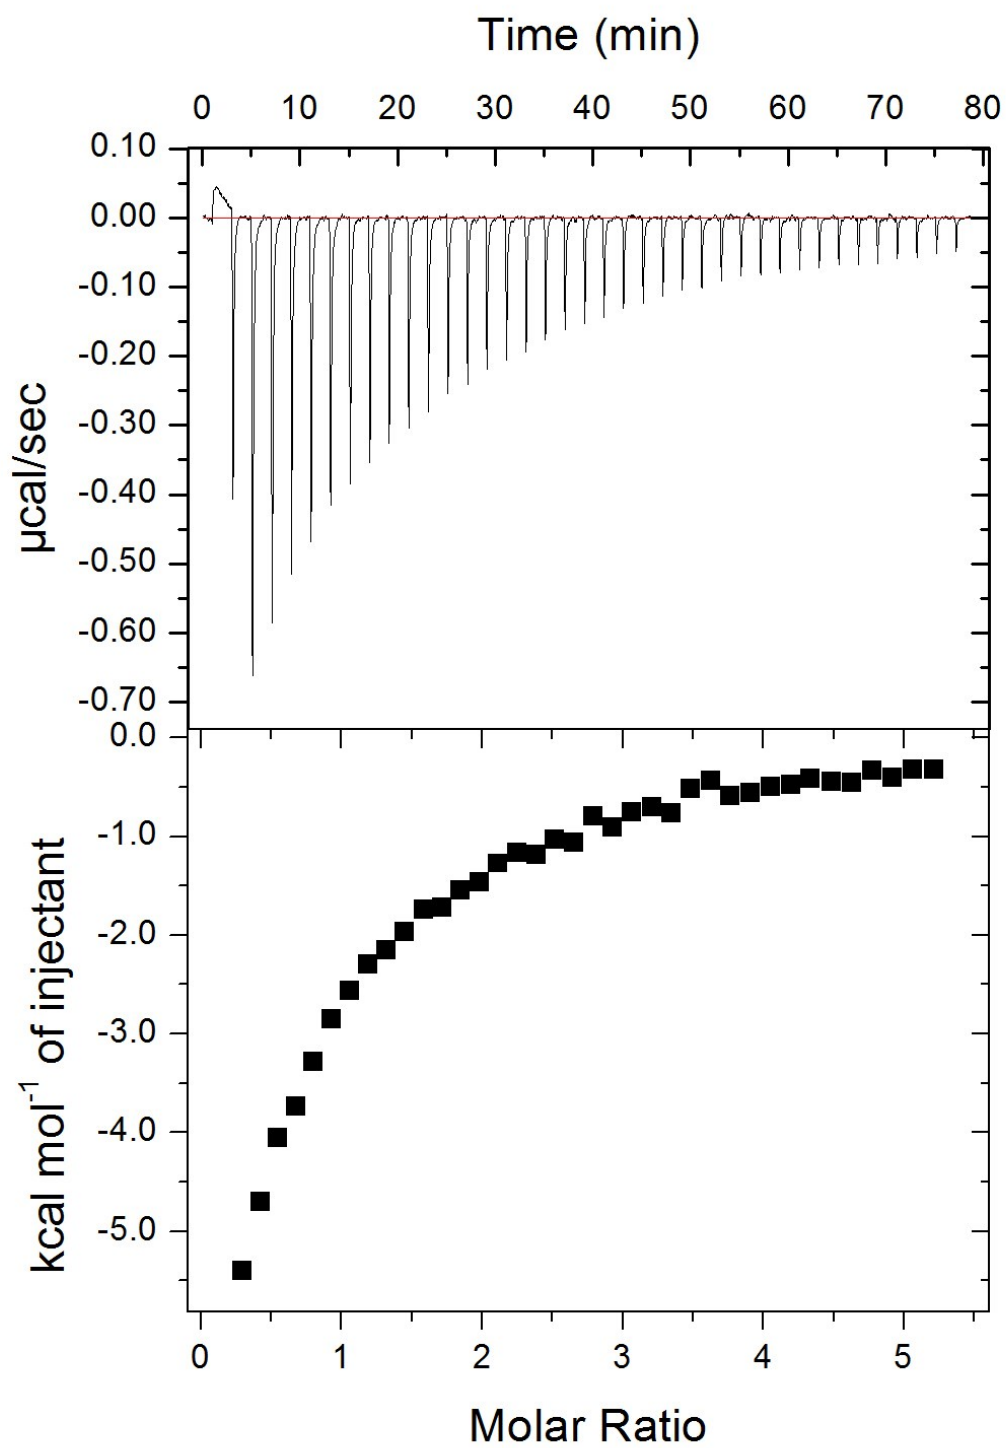

**Figure S14. ITC raw data.** Full ITC data (including raw data) for  $\text{Zn}^{2+}$  binding to 60  $\mu\text{M}$  HSA in the presence of 3 mol. eq. of palmitate, corresponding to data shown in Figure 2D.

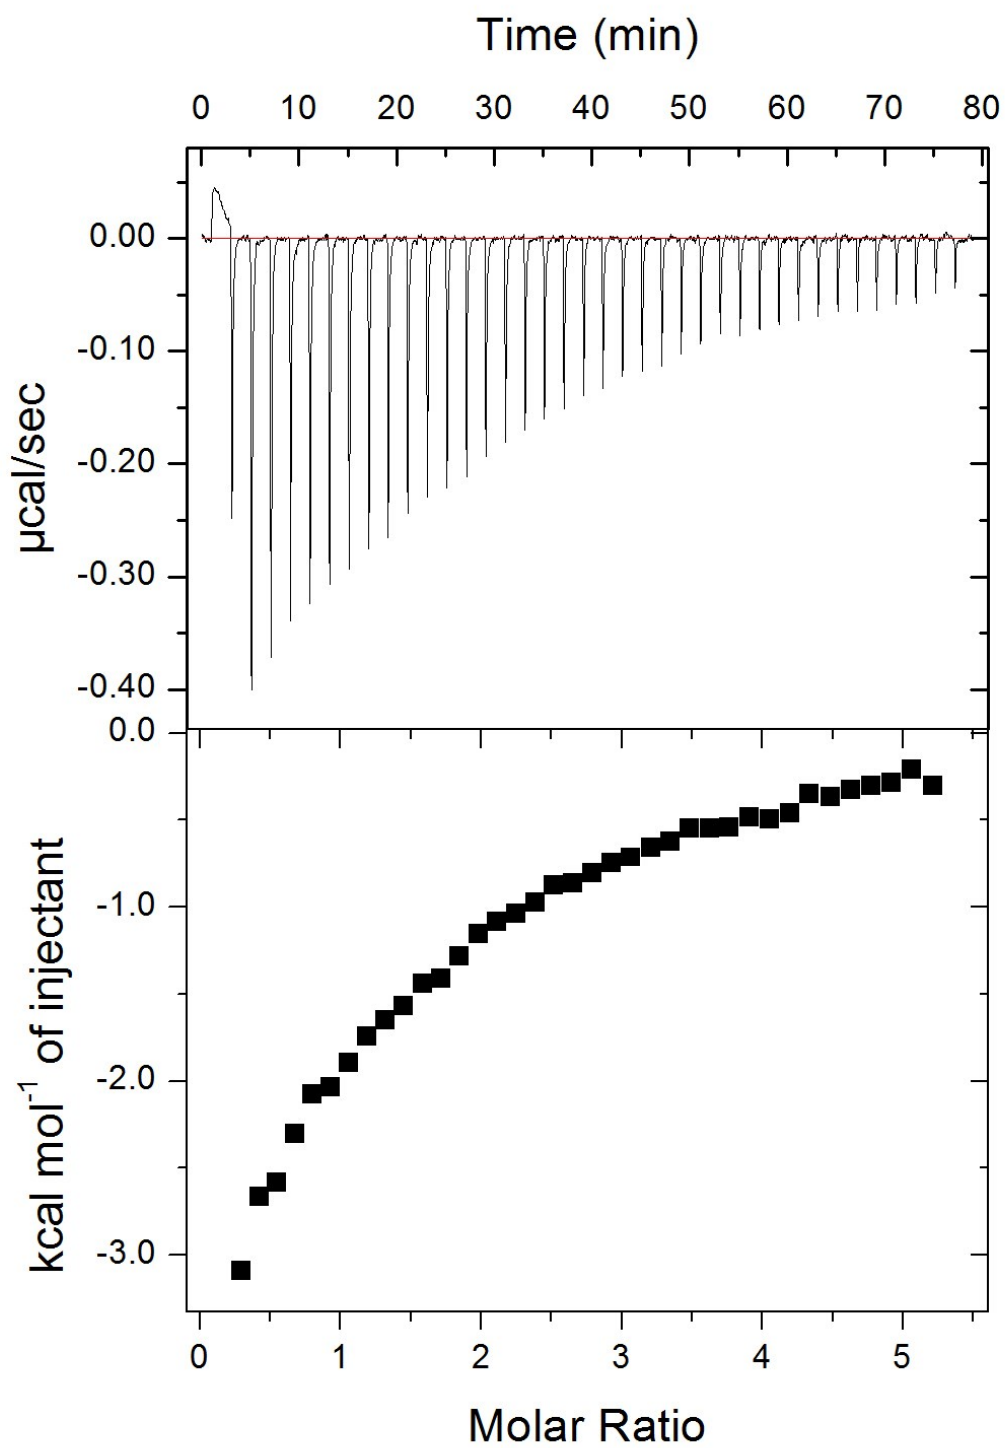

**Figure S15. ITC raw data.** Full ITC data (including raw data) for  $\text{Zn}^{2+}$  binding to 60  $\mu\text{M}$  HSA in the presence of 4 mol. eq. of palmitate, corresponding to data shown in Figure 2D.

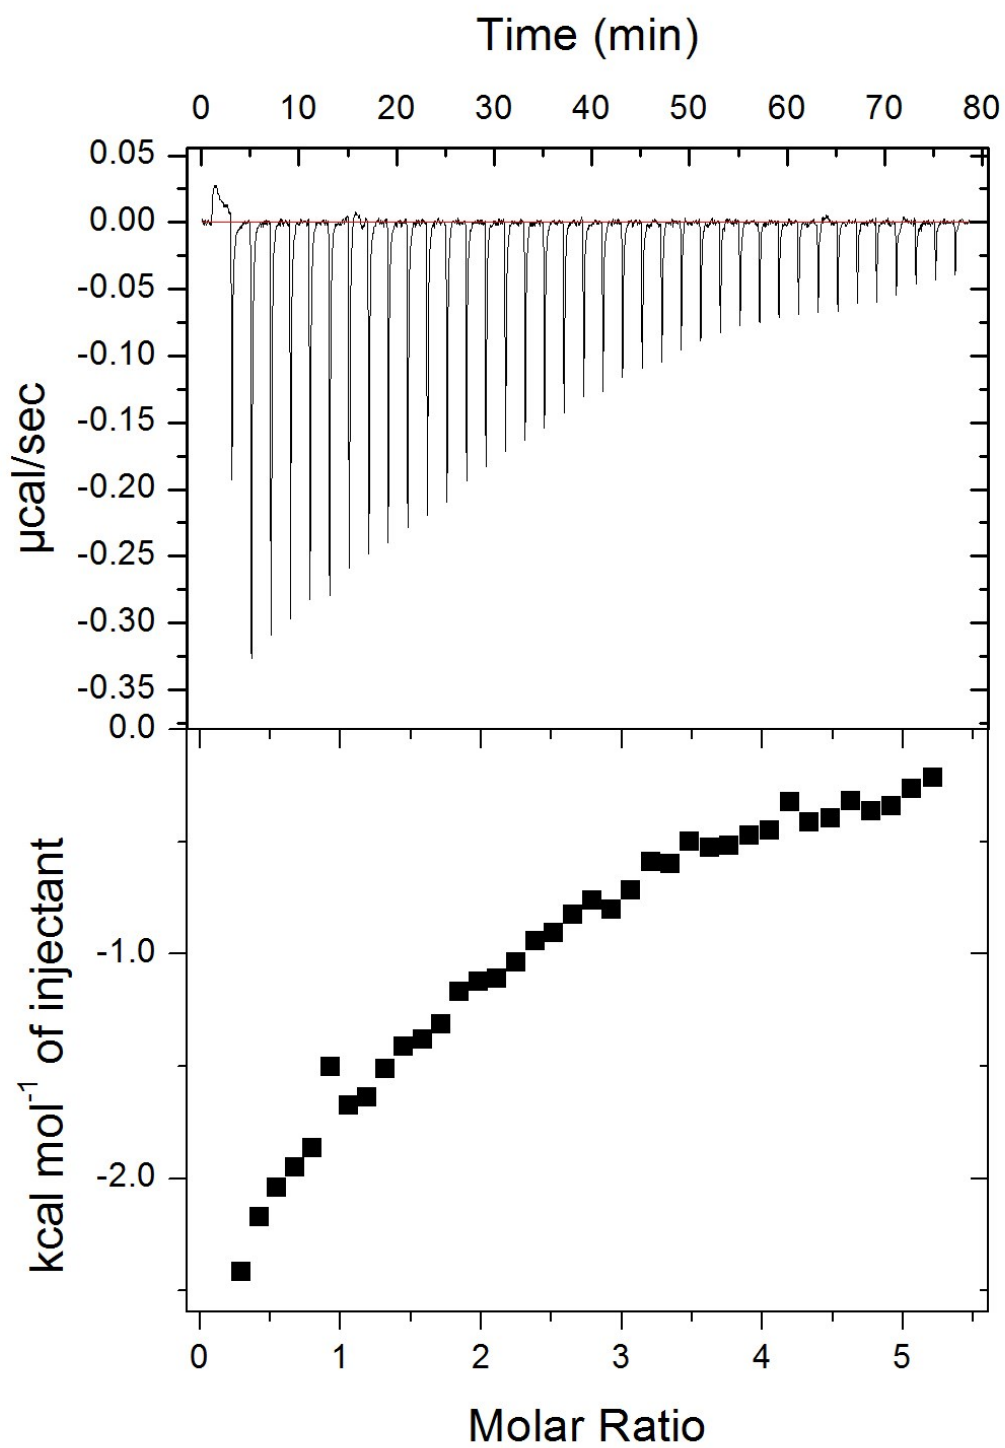

**Figure S16. ITC raw data.** Full ITC data (including raw data) for  $\text{Zn}^{2+}$  binding to 60  $\mu\text{M}$  HSA in the presence of 5 mol. eq. of palmitate, corresponding to data shown in Figure 2D.

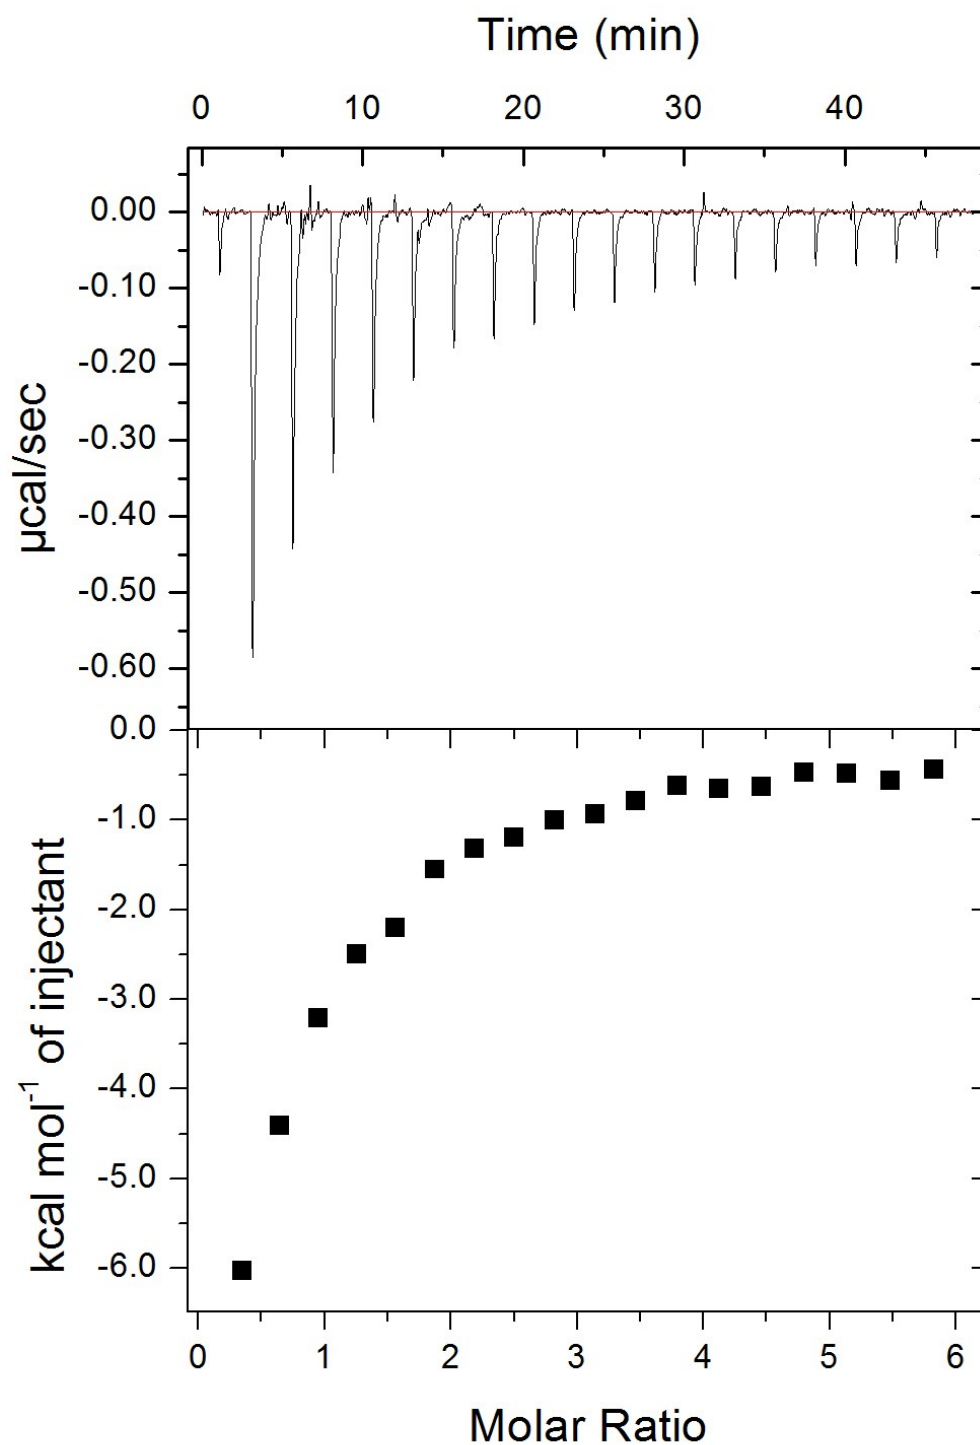

**Figure S17. ITC raw data.** Full ITC data (including raw data) for  $\text{Zn}^{2+}$  binding to 25  $\mu\text{M}$  HSA in the absence of NEFA, corresponding to data shown in Figures 2E-H.

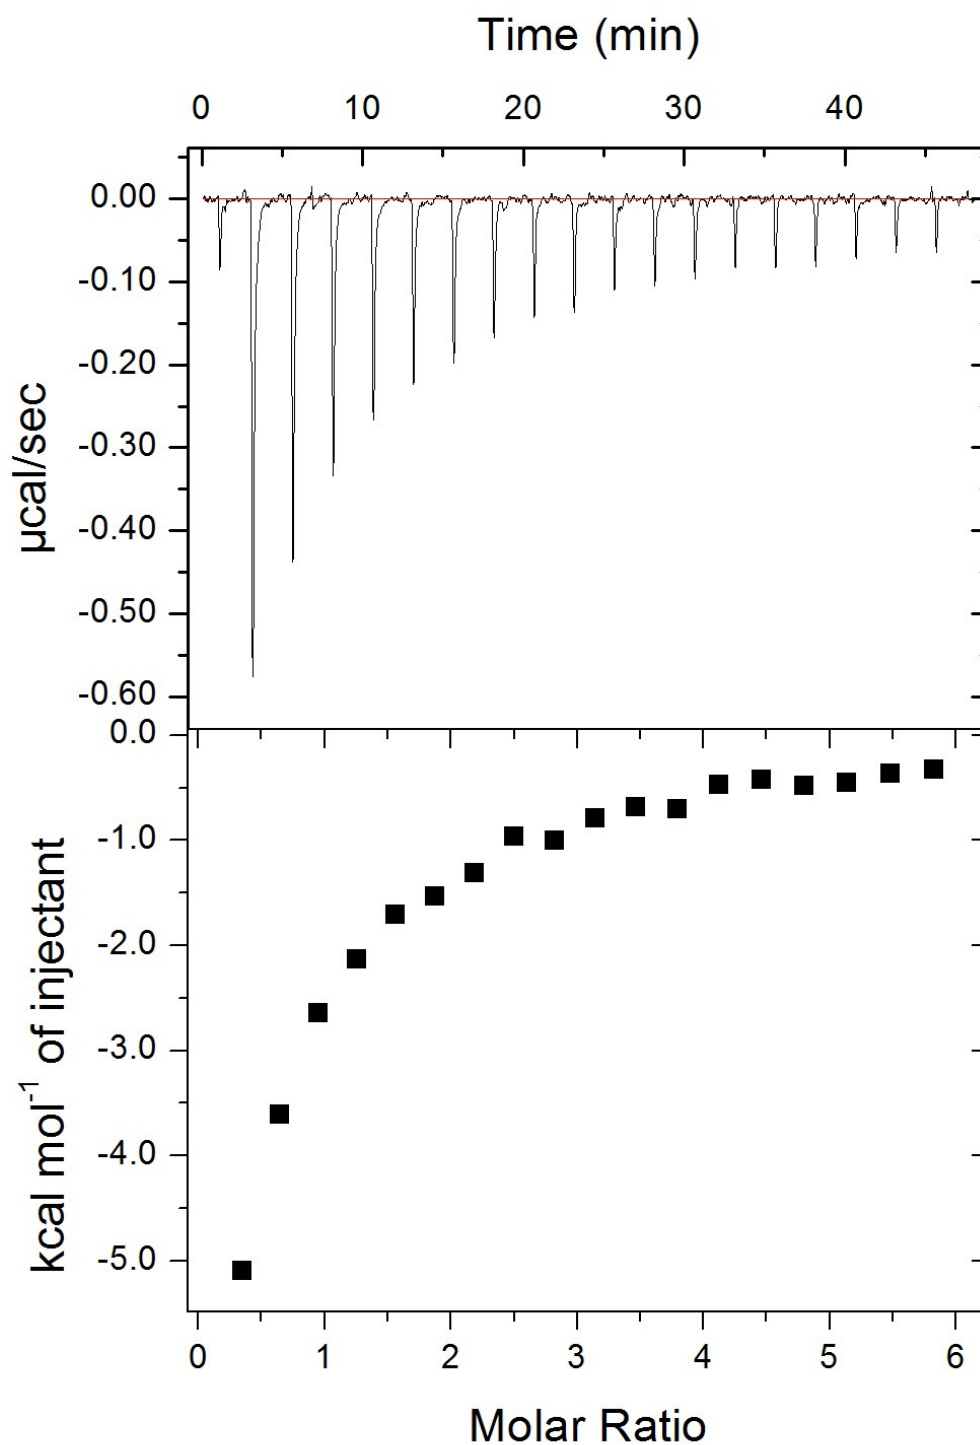

**Figure S18. ITC raw data.** Full ITC data (including raw data) for Zn<sup>2+</sup> binding to 25 μM HSA in the presence of 2.5 mol. eq. of palmitate, corresponding to data shown in Figure 2E.

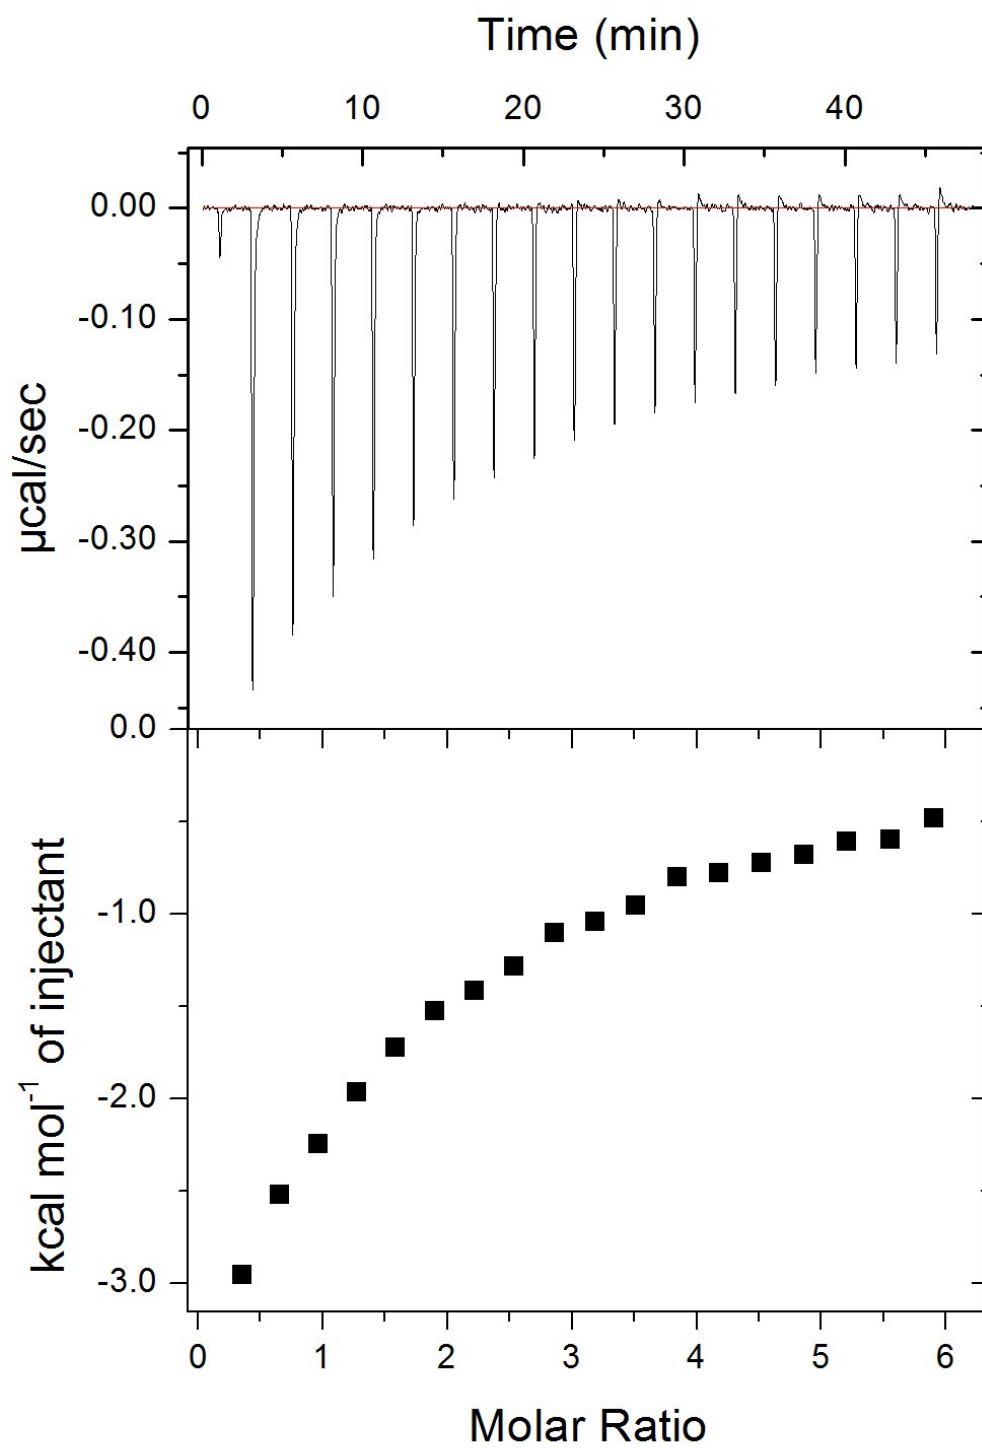

**Figure S19. ITC raw data.** Full ITC data (including raw data) for  $\text{Zn}^{2+}$  binding to 25  $\mu\text{M}$  HSA in the presence of 4 mol. eq. of palmitate, corresponding to data shown in Figure 2E.

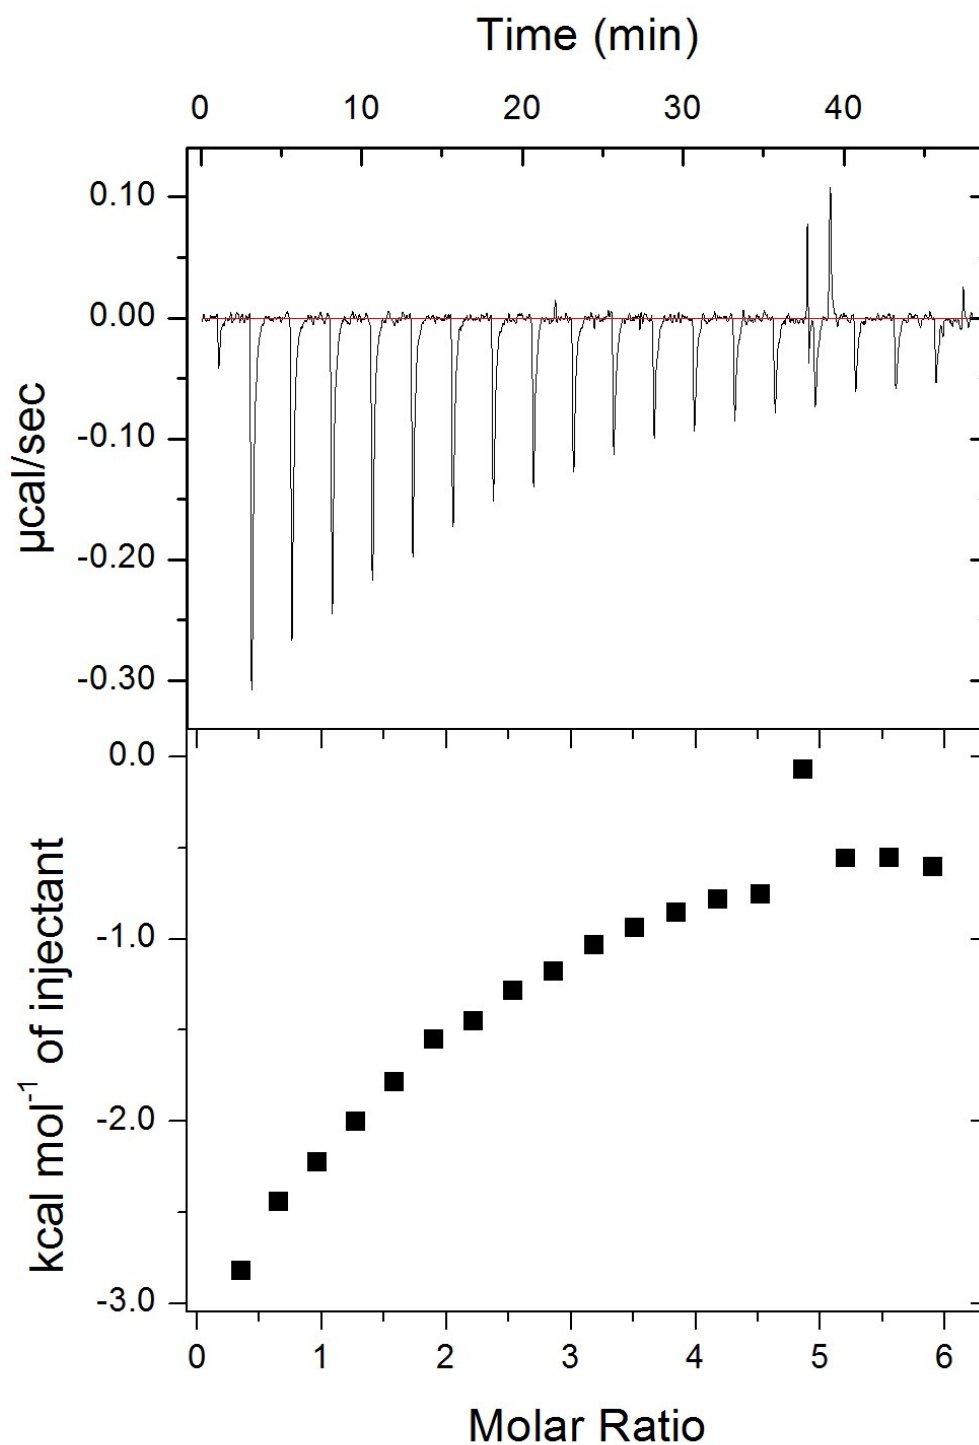

**Figure S20. ITC raw data.** Full ITC data (including raw data) for  $\text{Zn}^{2+}$  binding to 25  $\mu\text{M}$  HSA in the presence of 5 mol. eq. of palmitate, corresponding to data shown in Figure 2E.

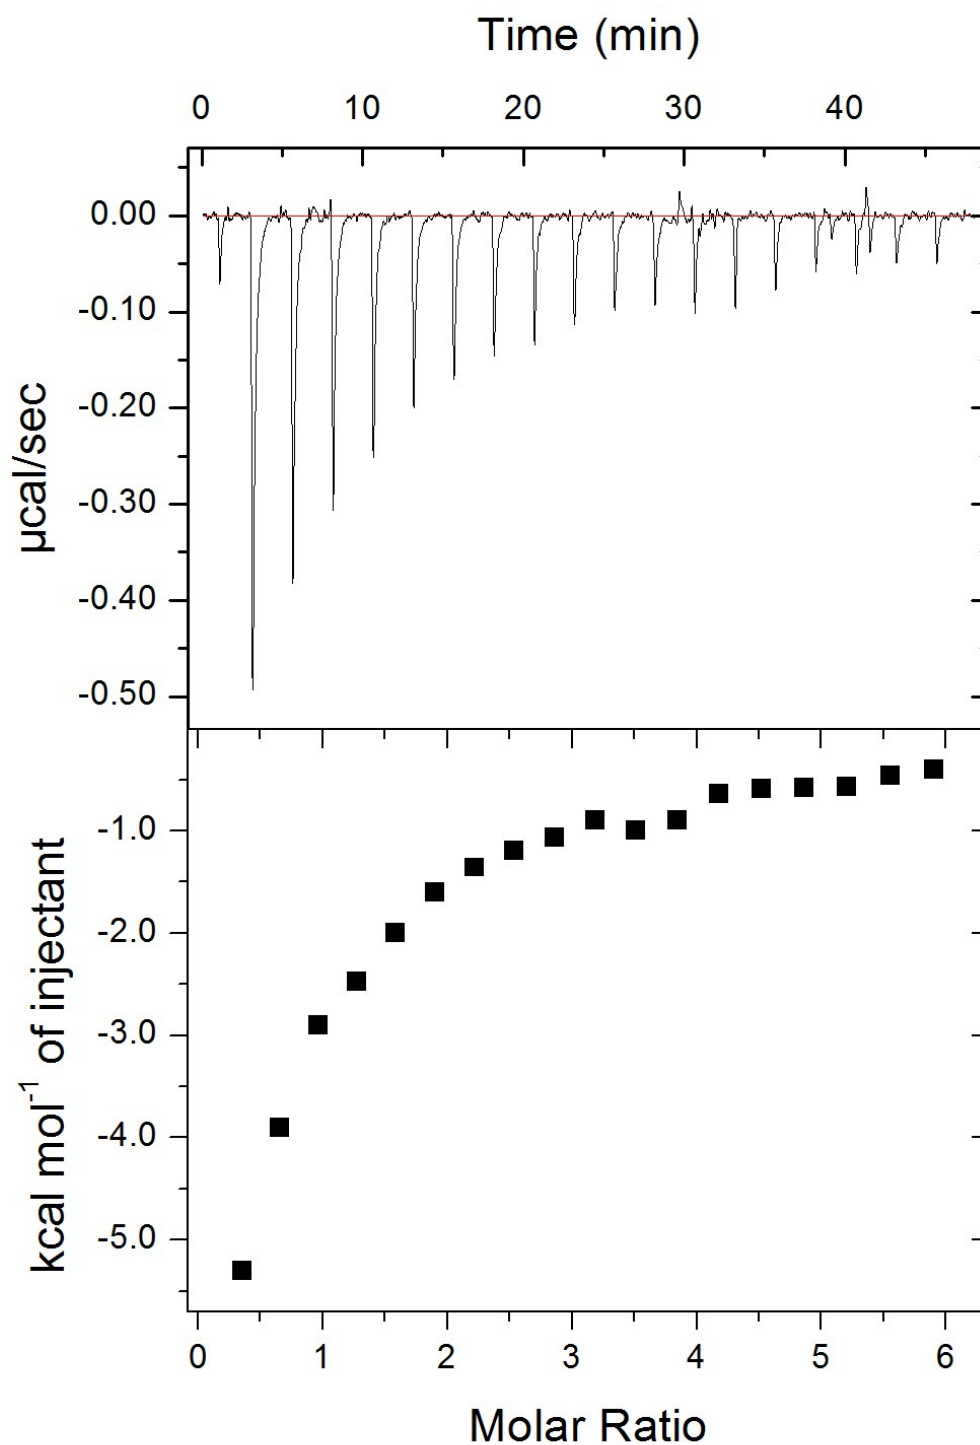

**Figure S21. ITC raw data.** Full ITC data (including raw data) for  $\text{Zn}^{2+}$  binding to 25  $\mu\text{M}$  HSA in the presence of 2.5 mol. eq. of stearate, corresponding to data shown in Figure 2F.

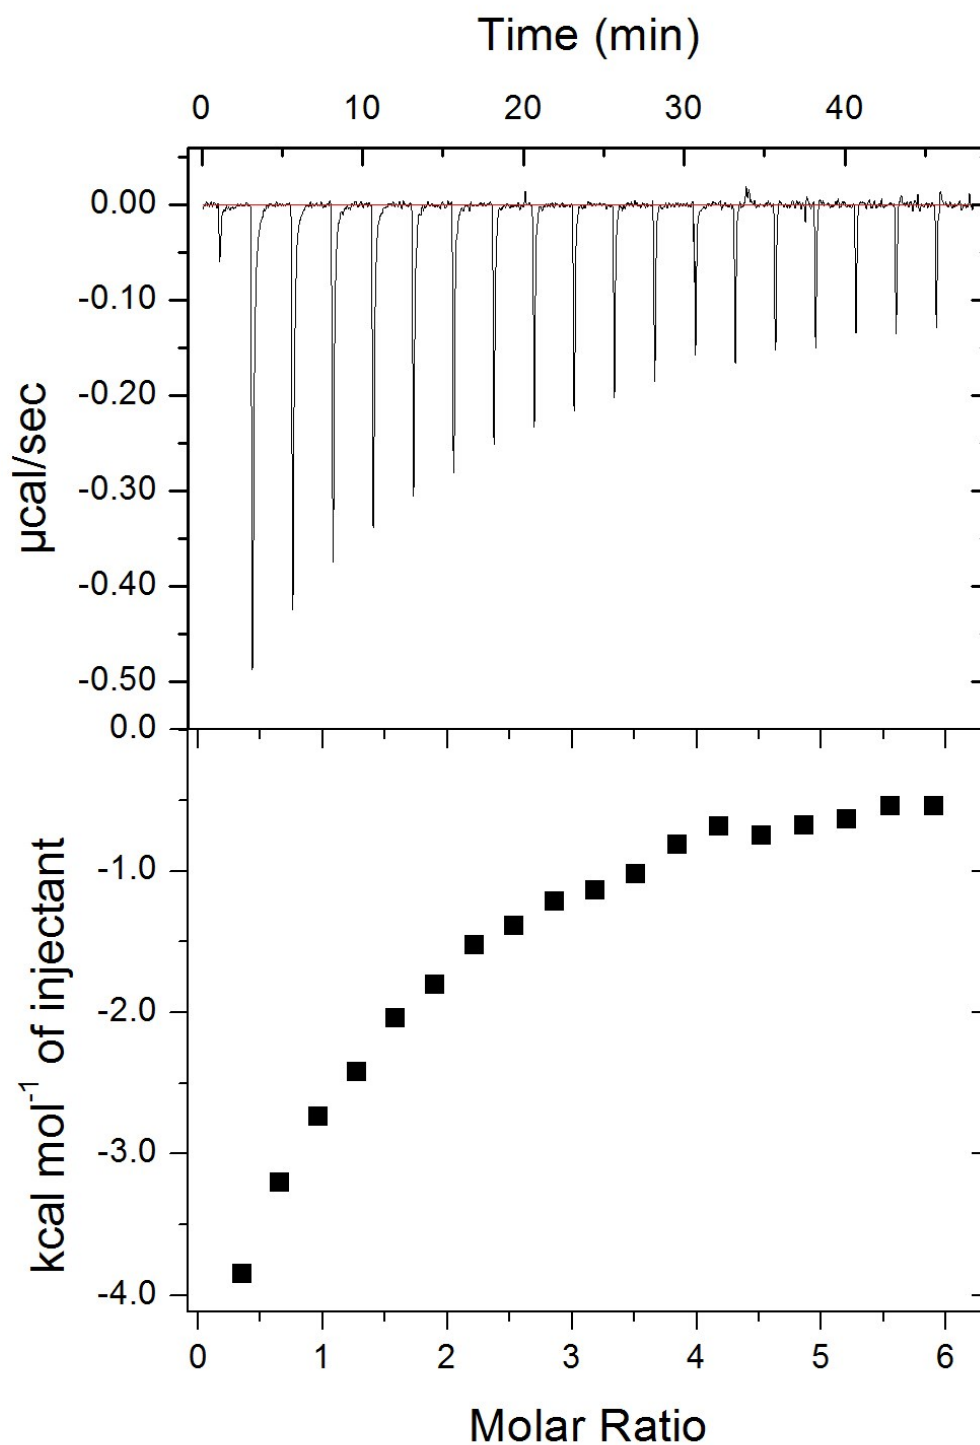

**Figure S22. ITC raw data.** Full ITC data (including raw data) for  $\text{Zn}^{2+}$  binding to 25  $\mu\text{M}$  HSA in the presence of 4 mol. eq. of stearate, corresponding to data shown in Figure 2F.

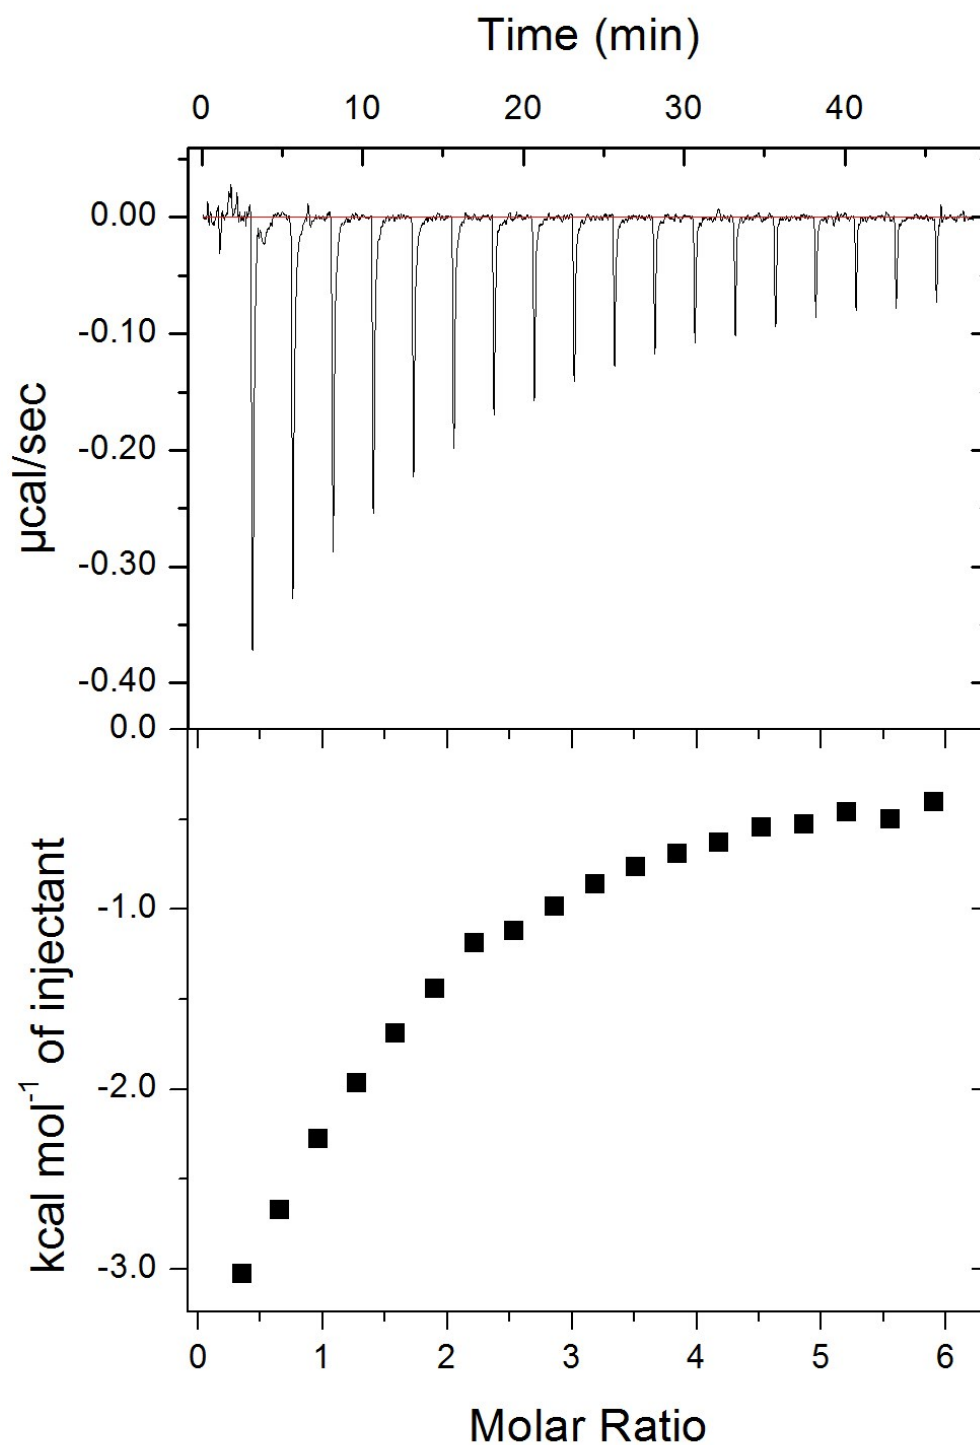

**Figure S23. ITC raw data.** Full ITC data (including raw data) for Zn<sup>2+</sup> binding to 25 μM HSA in the presence of 5 mol. eq. of stearate, corresponding to data shown in Figure 2F.

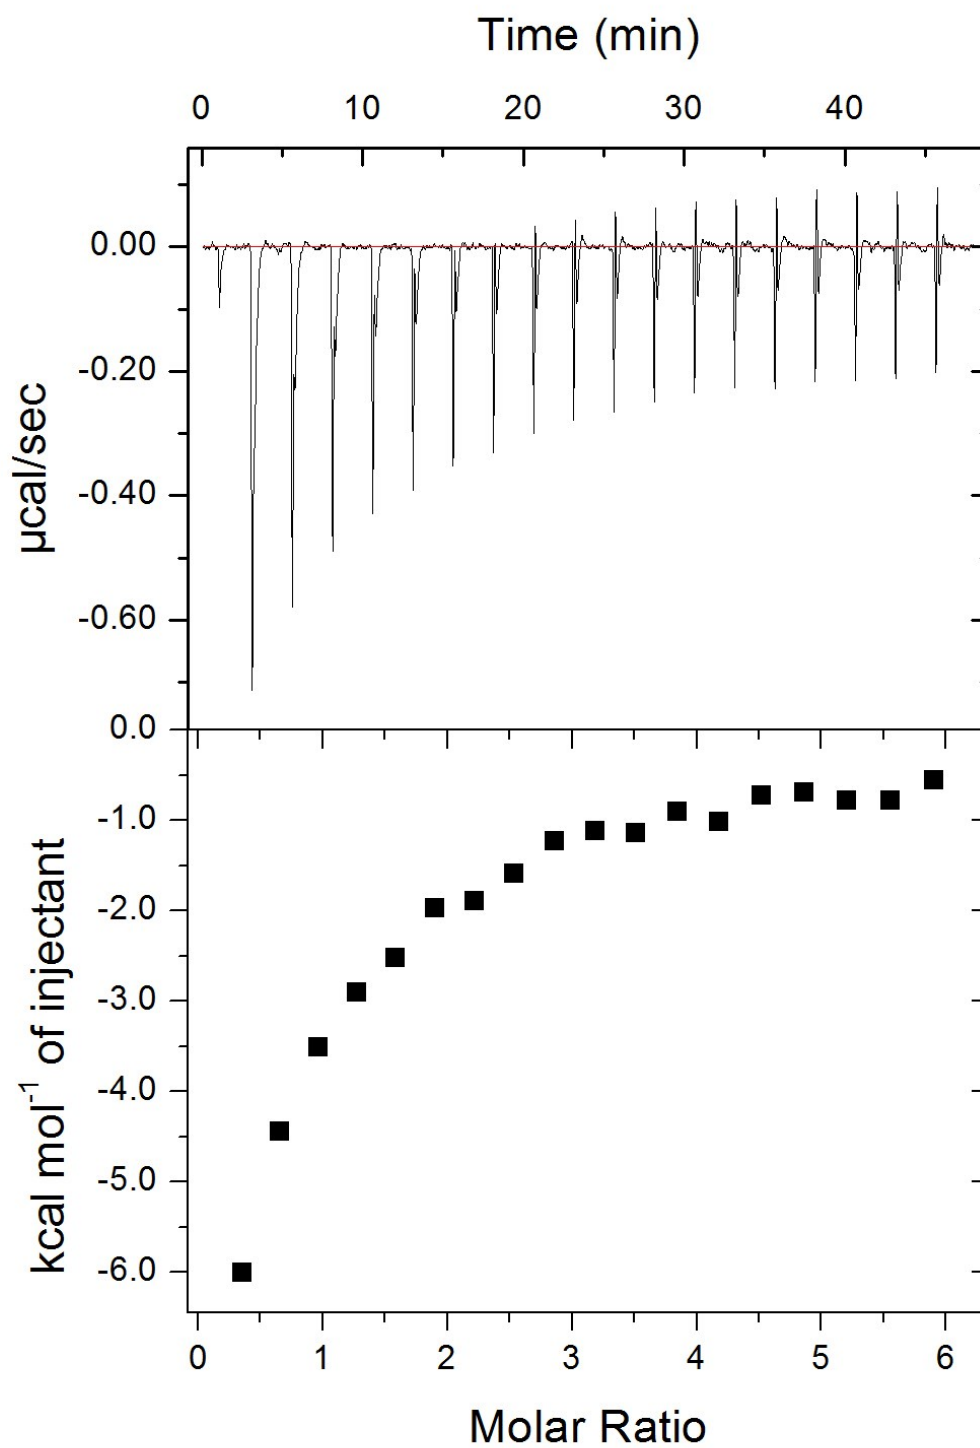

**Figure S24. ITC raw data.** Full ITC data (including raw data) for Zn<sup>2+</sup> binding to 25 μM HSA in the presence of 2.5 mol. eq. of palmitoleate, corresponding to data shown in Figure 2G.

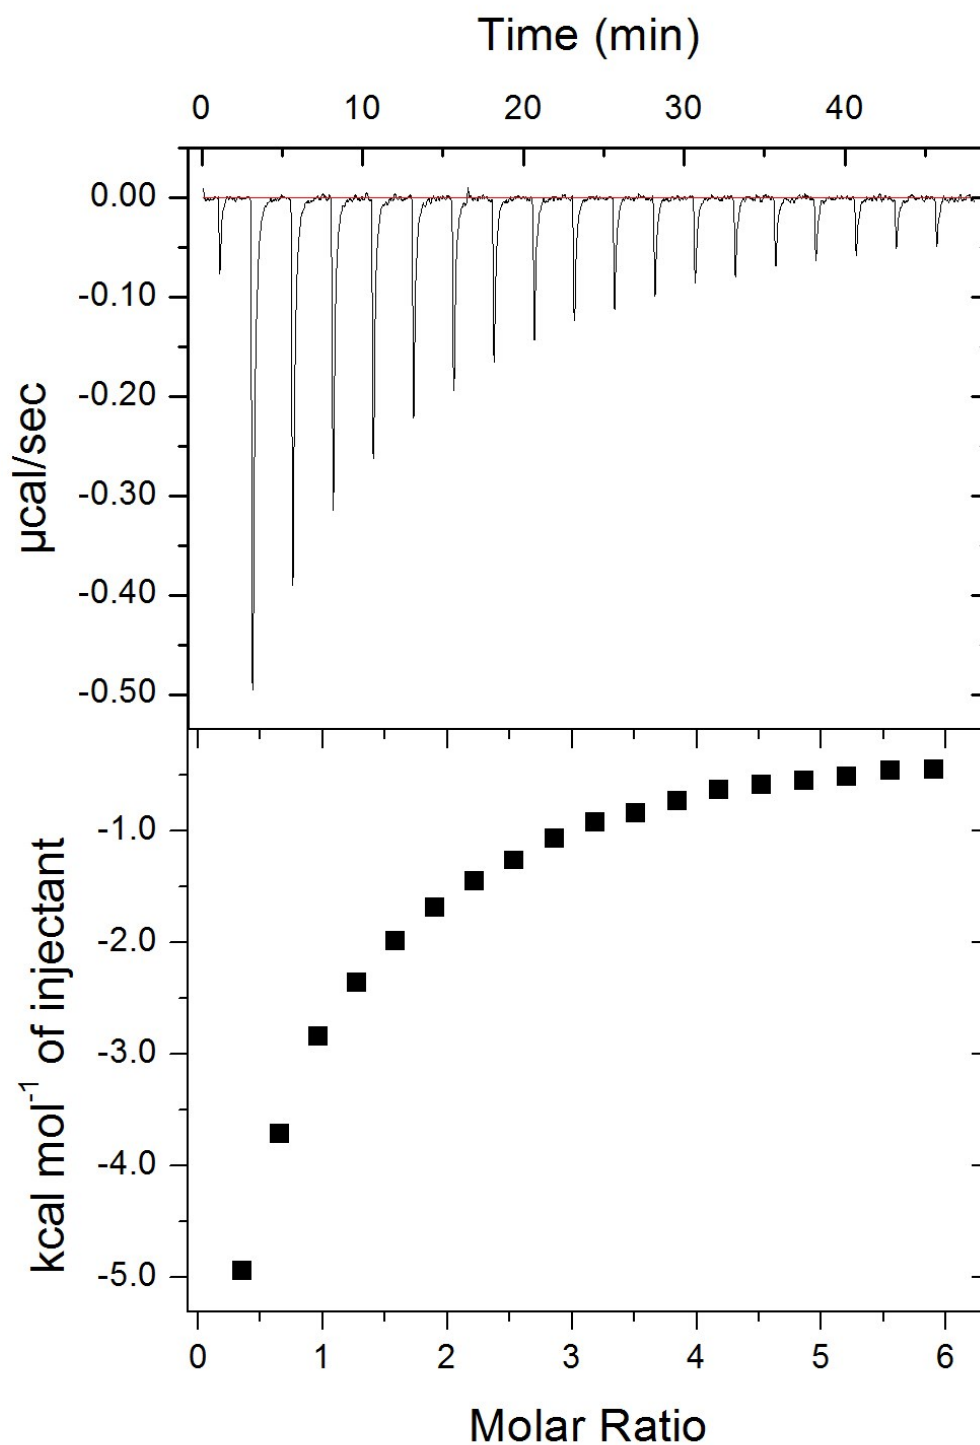

**Figure S25. ITC raw data.** Full ITC data (including raw data) for  $\text{Zn}^{2+}$  binding to 25  $\mu\text{M}$  HSA in the presence of 4 mol. eq. of palmitoleate, corresponding to data shown in Figure 2G.

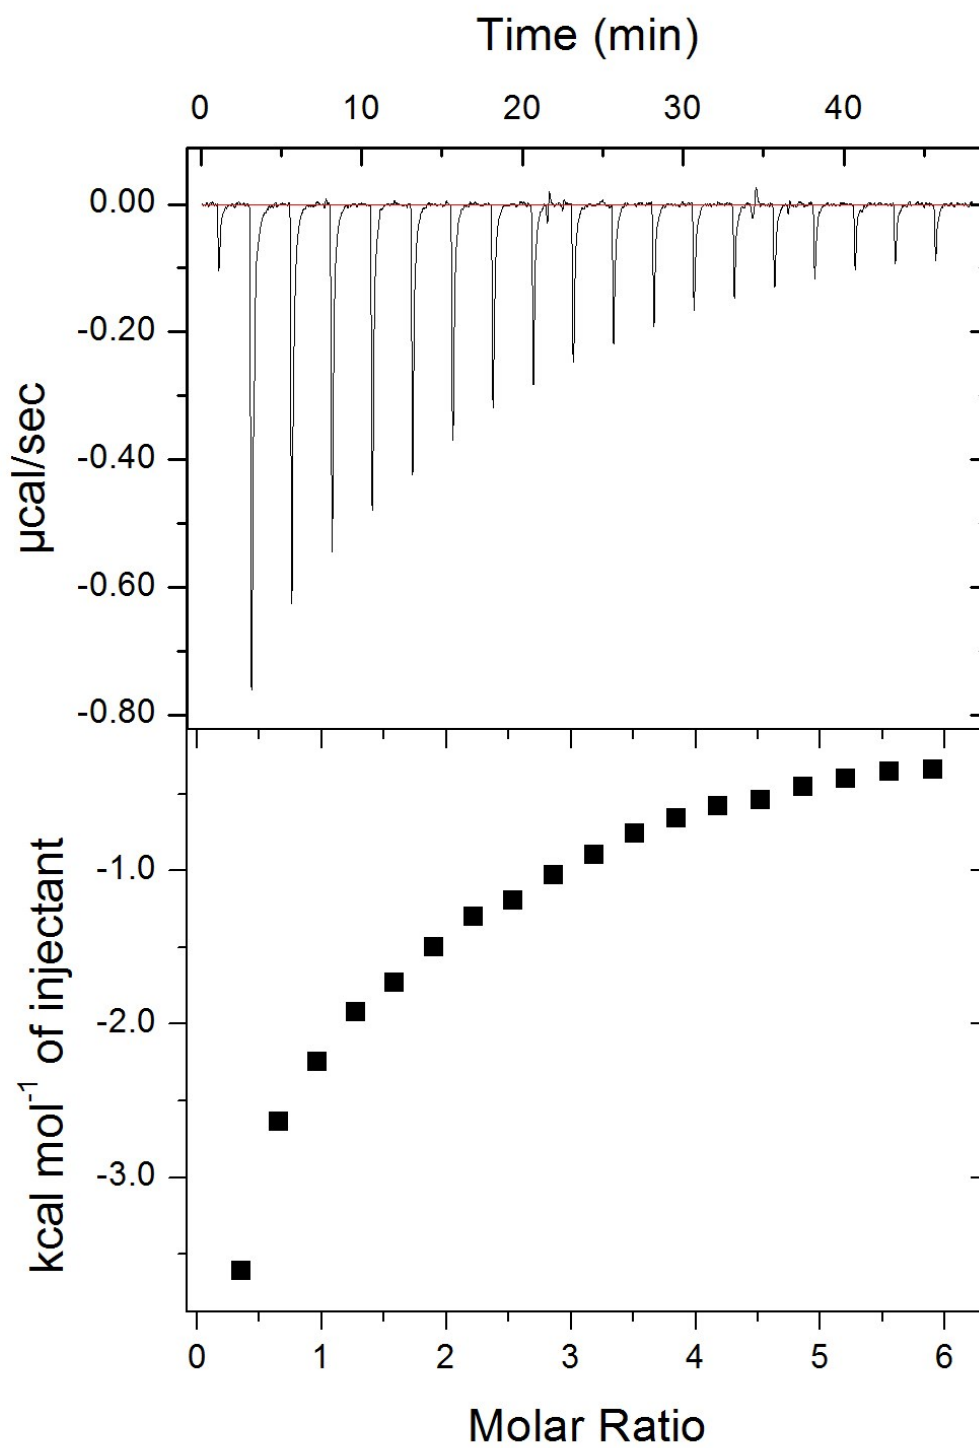

**Figure S26. ITC raw data.** Full ITC data (including raw data) for  $\text{Zn}^{2+}$  binding to 25  $\mu\text{M}$  HSA in the presence of 5 mol. eq. of palmitoleate, corresponding to data shown in Figure 2G.

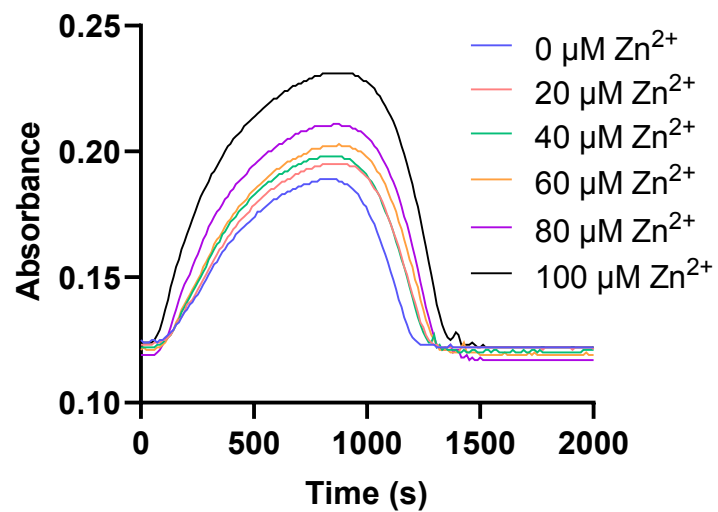

**Figure S27. Representative raw data from turbidimetric fibrin clotting and lysis assays.**  
Purified system, no myristate, 0-100  $\mu\text{M}$   $\text{Zn}^{2+}$ .

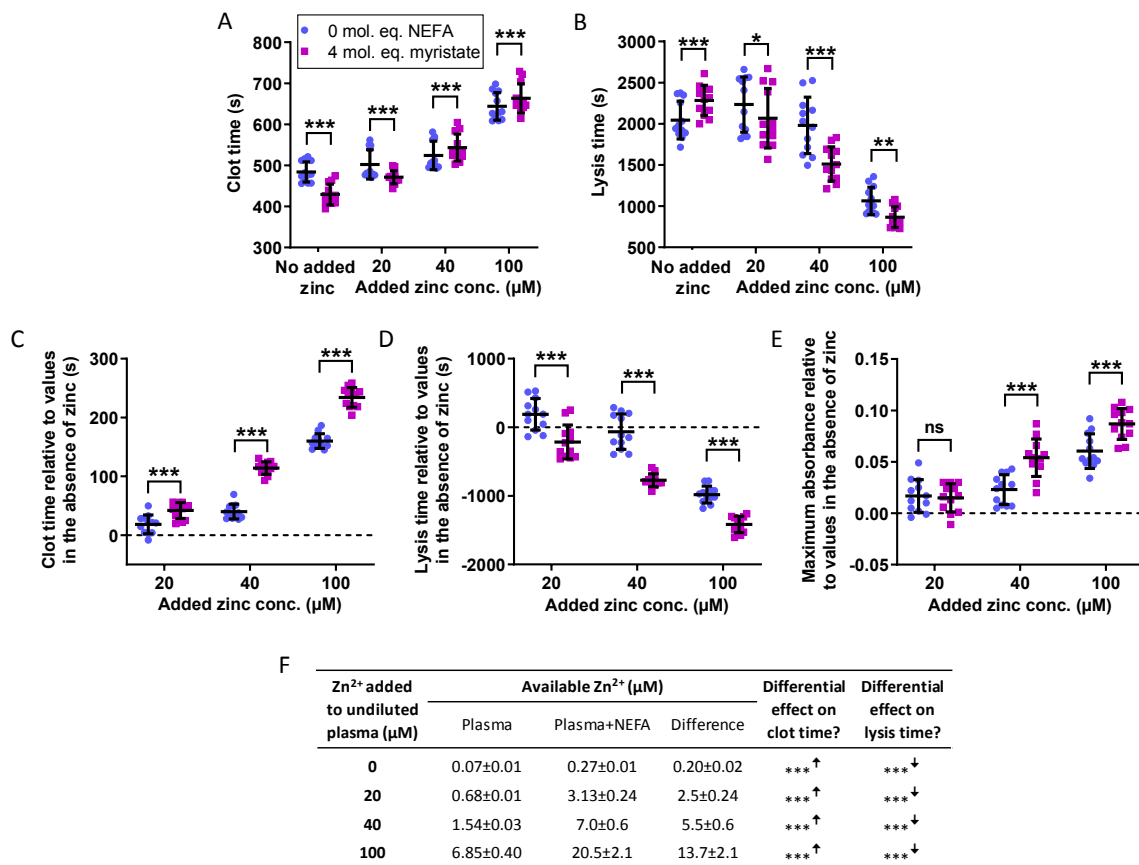

**Figure S28. Effects of Zn<sup>2+</sup> and NEFAs on fibrin clot parameters in pooled plasma and effects relative to the parameter values in the absence of Zn<sup>2+</sup>.** Turbidimetric fibrin clotting and lysis assays were performed in pooled plasma diluted 6-fold in buffer (50 mM Tris, 100 mM NaCl, pH 7.4), with final concentrations of 7.5 mM CaCl<sub>2</sub>, 0.03 U/ml thrombin, 20.8 ng/ml tPA, while 0-100 μM added ZnCl<sub>2</sub>, as well as either 0 or 4 mol. eq. myristate relative to HSA concentration (n=12). Fibrin clot parameters were measured: (A) clot time and (B) lysis time and maximum absorbance (data shown in Figure 4). Two-way ANOVAs followed by Sidak's multiple comparisons tests were used to analyse the data. Both parameters showed a significant difference with the addition of Zn<sup>2+</sup> (p<0.0001 for clot time and p<0.0001 for lysis time) as well as with 4 mol. eq. myristate (p=0.0002 for clot time p<0.0001 for lysis time). The parameter values relative to their values in the absence of Zn<sup>2+</sup> (+/- myristate) were then calculated: (C) clot time, (D) lysis time and (E) maximum absorbance. Two-way ANOVAs followed by Sidak's multiple comparisons tests were used to analyse the data. All parameters showed a significant difference with the addition of Zn<sup>2+</sup> (p<0.0001, for all three), as well as with 4 mol. eq. myristate (p<0.0001 and p<0.0001, p=0.0013 respectively). (F) Estimates for available Zn<sup>2+</sup> in pooled plasma in presence and absence of 4 mol. eq. added myristate. "Available Zn<sup>2+</sup>" was taken as the sum of free and Tris-bound Zn<sup>2+</sup>. Citrate has been suggested to mask the effects of Zn<sup>2+</sup> in coagulation; therefore, it was assumed that citrate-bound zinc would not be available to influence clotting or clot lysis. The entries in columns 5 and 6 refer to the data plotted in C and D). The data are represented as mean ± SD. Statistical significance is indicated by ns where p>0.05, \* where p<0.05, \*\* where p<0.01 and \*\*\* where p<0.001.

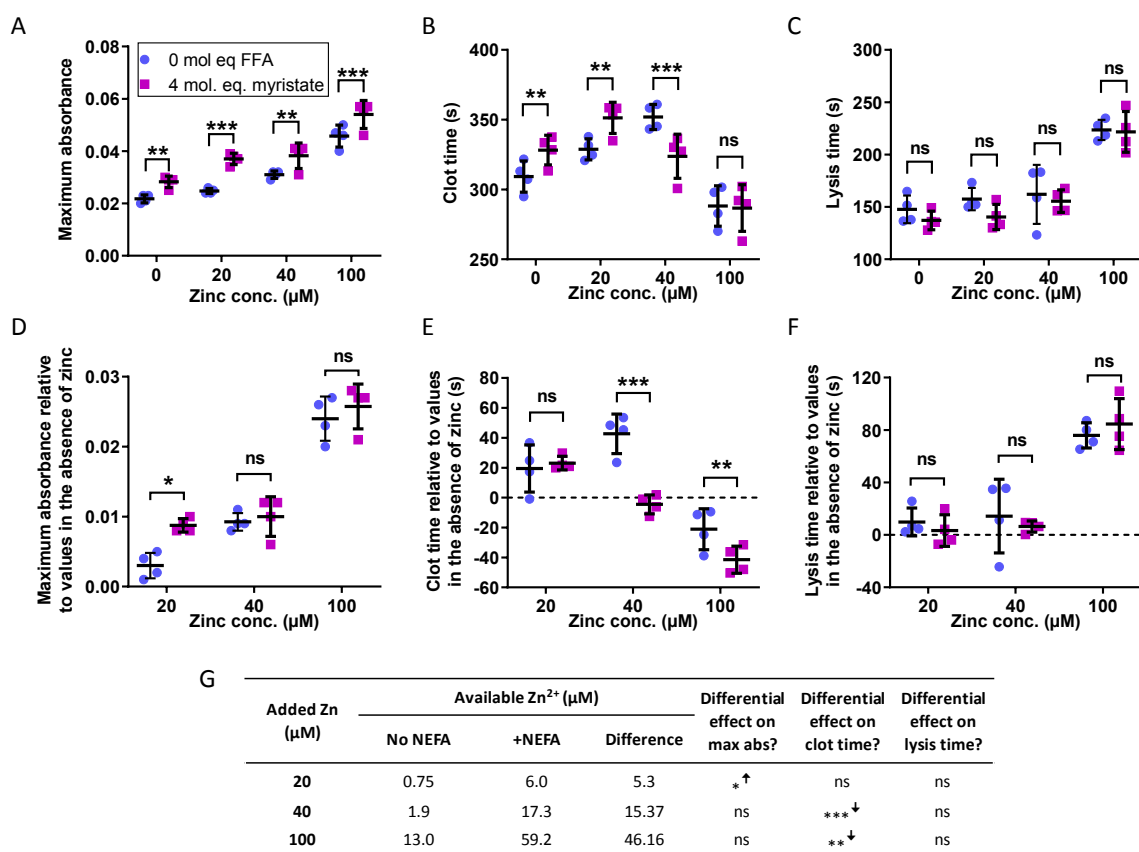

**Figure S29. Effects of Zn<sup>2+</sup> and NEFAs on fibrin clot parameters in a purified system and effects relative to the parameter values in the absence of Zn<sup>2+</sup>.** Turbidimetric fibrin clotting and lysis assays were performed in buffer (50 mM Tris, 100 mM NaCl, pH 7.4) with a final concentration of 0.5 mg/mL (2.9 μM) fibrinogen, 100 μM HSA, 2.5 mM CaCl<sub>2</sub>, 0.05 U/mL thrombin, 39 ng/mL tPA, 3.12 μg/mL plasminogen, 0-100 μM ZnCl<sub>2</sub>, and either 0 or 4 mol. eq. myristate relative to HSA concentration (n=4). Fibrin clot parameters including (A) maximum absorbance, (B) clot time and (C) lysis time were measured. Two-way ANOVAs followed by Sidak's multiple comparisons tests were used to analyse the data. Maximum absorbance, clot time and lysis time significantly increased in the presence of Zn<sup>2+</sup> (p<0.0001 for all). Clot time and lysis time were not significantly altered by the presence of 4 mol. eq. myristate, but maximum absorbance increased in the presence of myristate (p=0.0276). The parameter values relative to their values in the absence of Zn<sup>2+</sup> (+/- myristate) were then calculated: (D) maximum absorbance, (E) clot time and (F) lysis time. Two-way ANOVAs followed by Sidak's multiple comparisons tests were used to analyse the data. Maximum absorbance, clot time and lysis time significantly increased in the presence of Zn<sup>2+</sup> (p<0.0001 for all). Maximum absorbance and clot time increased in the presence of 4 mol. eq. myristate (p= 0.0455 and p=0.0194 respectively), while lysis time was not significantly altered. The data are represented as mean ± SD. On the abscise axes, "0 μM Zn<sup>2+</sup>" refers to no added Zn<sup>2+</sup> in the system. (G) Estimates for available Zn<sup>2+</sup> in the purified system in presence and absence of 4 mol. eq. added myristate. "Available Zn<sup>2+</sup>" was taken as the sum of free and Tris-bound Zn<sup>2+</sup>. The HSA concentrations used for the calculation was 100 μM. The differential effects on maximum absorbance, clot time and lysis time are from D-F. Statistical significance is indicated by ns where p>0.05, \* where p<0.05, \*\* where p<0.01 and \*\*\* where p<0.001.

**Table S6. Demographic information and the results from plasma analysis for the T2DM and control subjects.** All values are presented as mean  $\pm$  standard deviation. The *P*-values were calculated by Student's *t*-test.

|                                                                      | Controls (n=18) | Patients with T2DM (n=54) | P-values |
|----------------------------------------------------------------------|-----------------|---------------------------|----------|
| Age (years)                                                          | 57.1 $\pm$ 8.9  | 60.9 $\pm$ 7.6            | 0.0814   |
| Sex (% female)                                                       | 56              | 13                        | 0.0001   |
| Weight (kg)                                                          | 70.2 $\pm$ 12.9 | 96.3 $\pm$ 17.8           | <0.0001  |
| BMI                                                                  | 25.0 $\pm$ 3.2  | 32.6 $\pm$ 5.3            | <0.0001  |
| Number of individuals who smoke                                      | 1               | 10                        | -        |
| Number of individuals who have had microvascular events              | -               | 22                        | -        |
| Number of individuals who have had macrovascular events              | -               | 31                        | -        |
| Numbers of individuals with familial history of autoimmunity         | 2               | 7                         | -        |
| Numbers of individuals with familial history of Huntington's disease | 3               | 30                        | -        |
| Diabetes duration (months)                                           | -               | 139 $\pm$ 78              | -        |
| Fasting glucose (mM)                                                 | 4.8 $\pm$ 0.5   | 10.3 $\pm$ 4.6            | <0.0001  |
| HbA1c (mmol/mol)                                                     | 37.6 $\pm$ 4.3  | 72.4 $\pm$ 22.8           | <0.0001  |
| Triglyceride (mM)                                                    | 0.95 $\pm$ 0.28 | 2.1 $\pm$ 2.0             | 0.0313   |
| Cholesterol (mM)                                                     | 5.3 $\pm$ 0.7   | 3.8 $\pm$ 0.8             | <0.0001  |
| LDL (mM)                                                             | 3.0 $\pm$ 0.7   | 1.9 $\pm$ 0.5             | <0.0001  |
| HDL (mM)                                                             | 1.9 $\pm$ 0.5   | 1.1 $\pm$ 0.3             | <0.0001  |
| Cholesterol/HDL ratio                                                | 3.1 $\pm$ 0.9   | 3.7 $\pm$ 0.9             | 0.0198   |
| Urea concentration (mM)                                              | 5.7 $\pm$ 1.2   | 6.3 $\pm$ 2.4             | 0.3399   |
| Platelet count ( $\times 1000/\mu\text{L}$ )                         | 258 $\pm$ 73*   | 251 $\pm$ 53              | 0.8367   |
| Fibrinogen (g/L)                                                     | 2.7 $\pm$ 0.3*  | 2.7 $\pm$ 0.5             | 0.9005   |

\* data only available for 3 samples

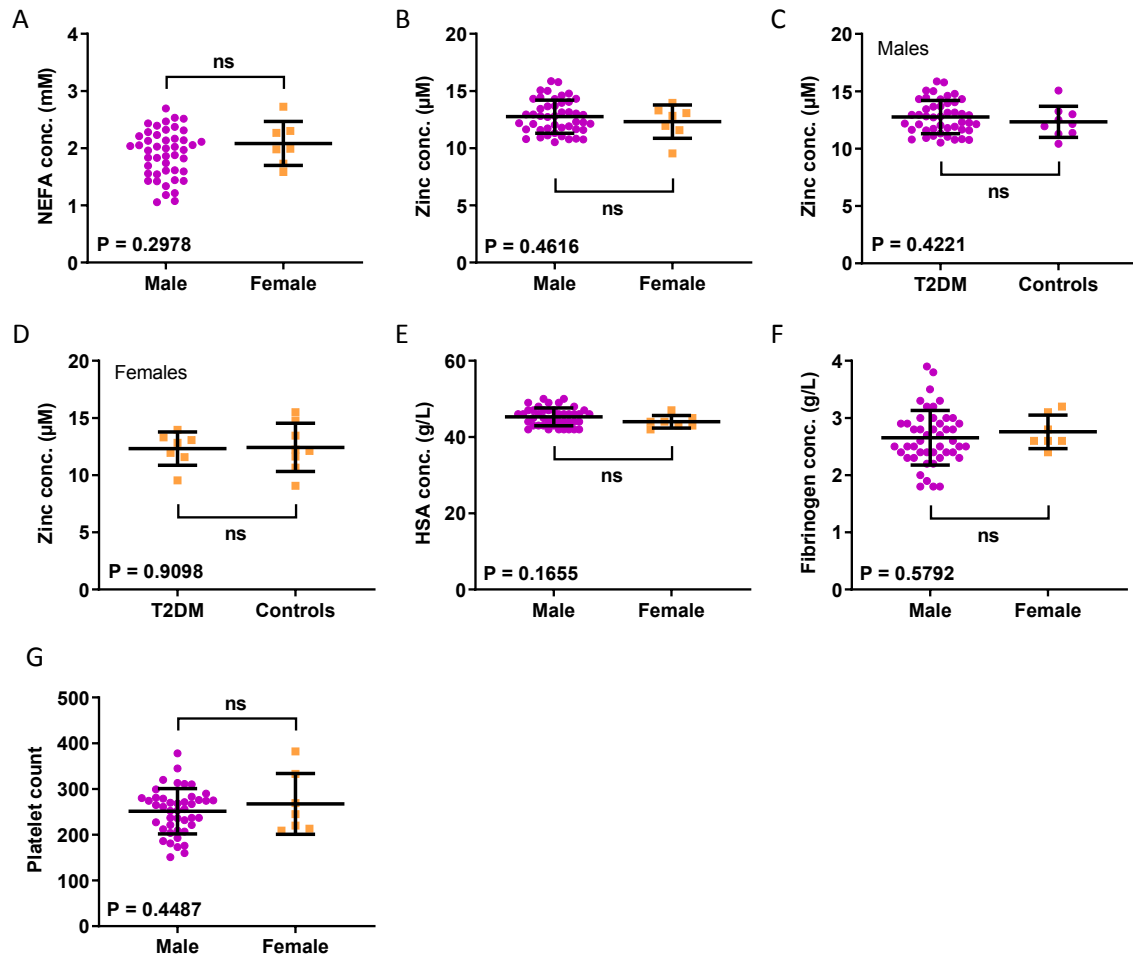

**Figure S30. Comparisons of NEFA, zinc, HSA and fibrinogen concentrations and of platelet count between sexes in plasma samples from individuals with T2DM and controls.** Differences in (A) plasma NEFA concentrations and (B) total plasma zinc concentrations between sexes in patients with T2DM are shown. Differences in total plasma zinc concentration in individuals with T2DM and controls in (C) males and (D) females are shown. Differences in (E) HSA concentrations, (F) plasma fibrinogen concentrations and (G) platelet count between sexes in patients with T2DM are shown. (A-G) In all cases no statistically significant differences were found between the respective parameters (ns;  $p > 0.05$ ). The data are represented as mean  $\pm$  SD. T-tests were used to analyse the data.

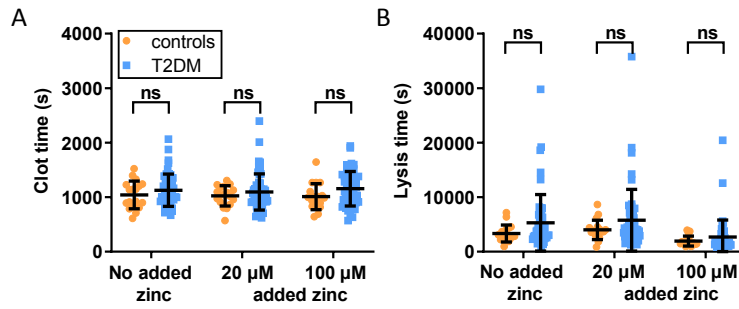

**Figure S31. Comparison of the clot formation and lysis parameters in plasma samples from patient with T2DM and controls.** Turbidimetric fibrin clotting assays were performed in plasma samples with final concentration of plasma diluted 3-fold in buffer, 7.5 mM  $\text{CaCl}_2$ , 0.03 U/mL thrombin and 0, 20 or 100  $\mu\text{M}$  added  $\text{ZnCl}_2$  ( $n=54$  for diabetes subjects and  $n=18$  for controls). (A) Clot time was calculated from those experiments. Turbidimetric fibrin clotting and lysis assays were then performed with final concentrations of: plasma diluted 6-fold in buffer, 7.5 mM  $\text{CaCl}_2$ , 0.03 U/mL thrombin, 20.8 ng/mL tPA and 0, 20 or 100  $\mu\text{M}$  added  $\text{ZnCl}_2$ . (B) Lysis time was calculated from those experiments. The data are represented as mean  $\pm$  SD. Two-way ANOVAs followed by Sidak's multiple comparison tests were used to analyse the data. Lysis time increased significantly in T2DM subjects compared to controls ( $p=0.0258$ , two-way ANOVA), as well as in the presence of  $\text{Zn}^{2+}$  ( $p=0.0258$ ); however multiple comparison tests showed that individual comparisons between control and T2DM at "no added zinc", "20  $\mu\text{M}$  added zinc" or "100  $\mu\text{M}$  added zinc" individually were not significant. Clot time was not significantly altered in the presence or absence of  $\text{Zn}^{2+}$  or when comparing the T2DM group to the control group. Statistical significance is indicated with ns where  $p>0.05$ .

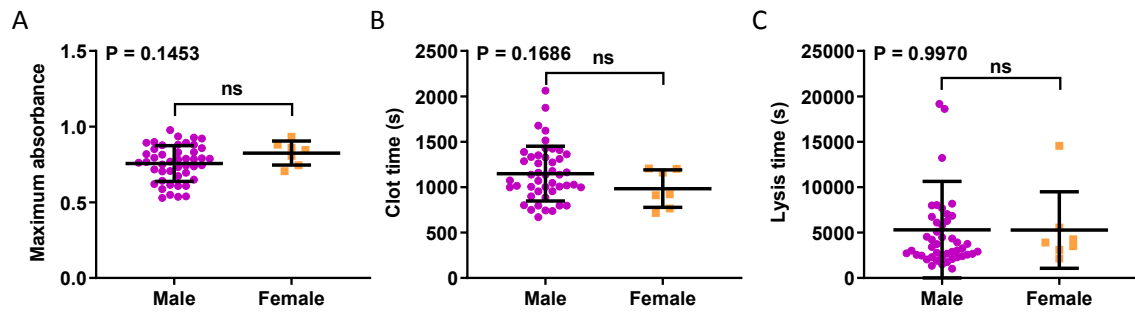

**Figure S32. Comparison of clotting parameters between sexes in plasma samples from patients with T2DM and controls.** (A) Maximum absorbance, (B) clot time and (C) lysis time. No difference was found. The data are represented as mean  $\pm$  SD. T-tests were used to analyse the data. Statistical significance is indicated with ns where  $p > 0.05$ .

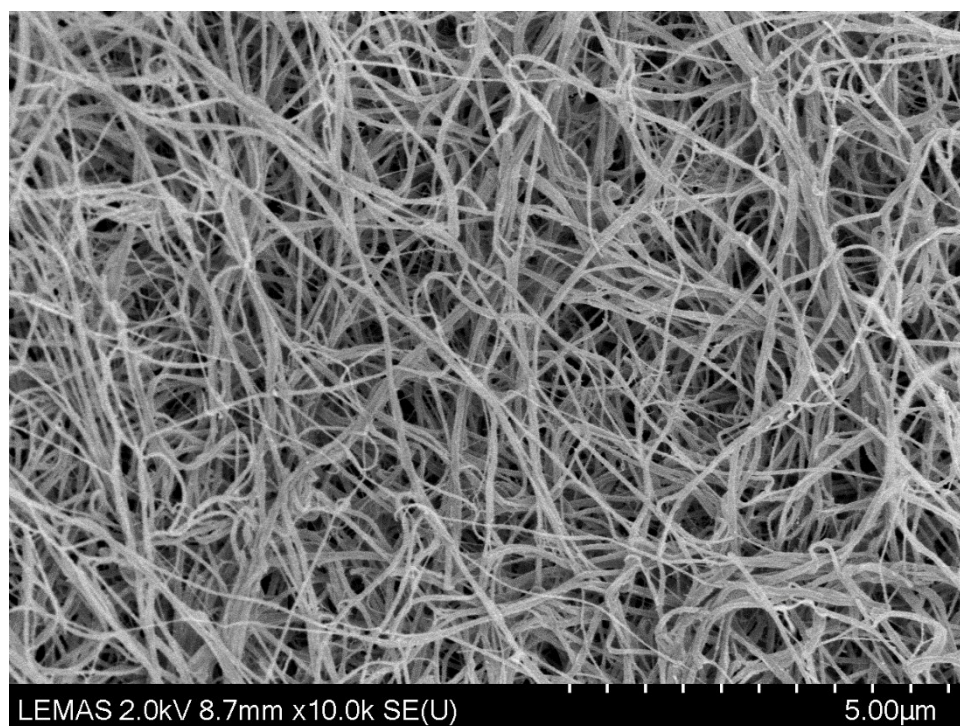

**Figure S33. Representative image from SEM experiments. Purified system, no zinc.** The image was viewed and photographed at  $\times 10,000$  magnification using a SU8230 SEM.

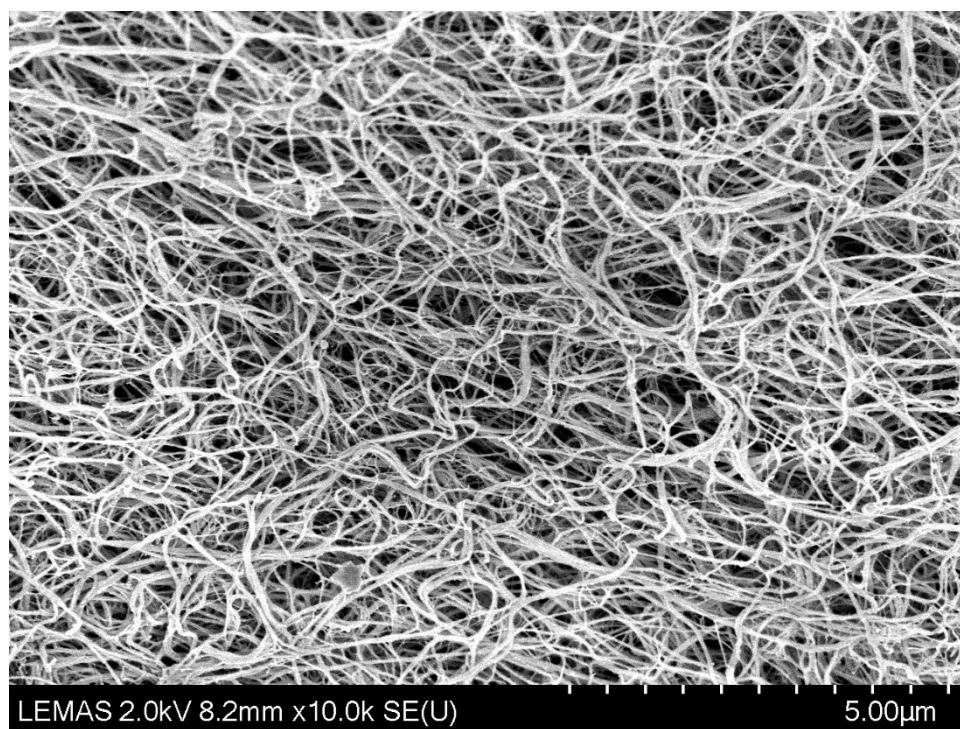

**Figure S34. Representative image from SEM experiments. Purified system, 18  $\mu\text{M}$  zinc.** The image was viewed and photographed at  $\times 10,000$  magnification using a SU8230 SEM.

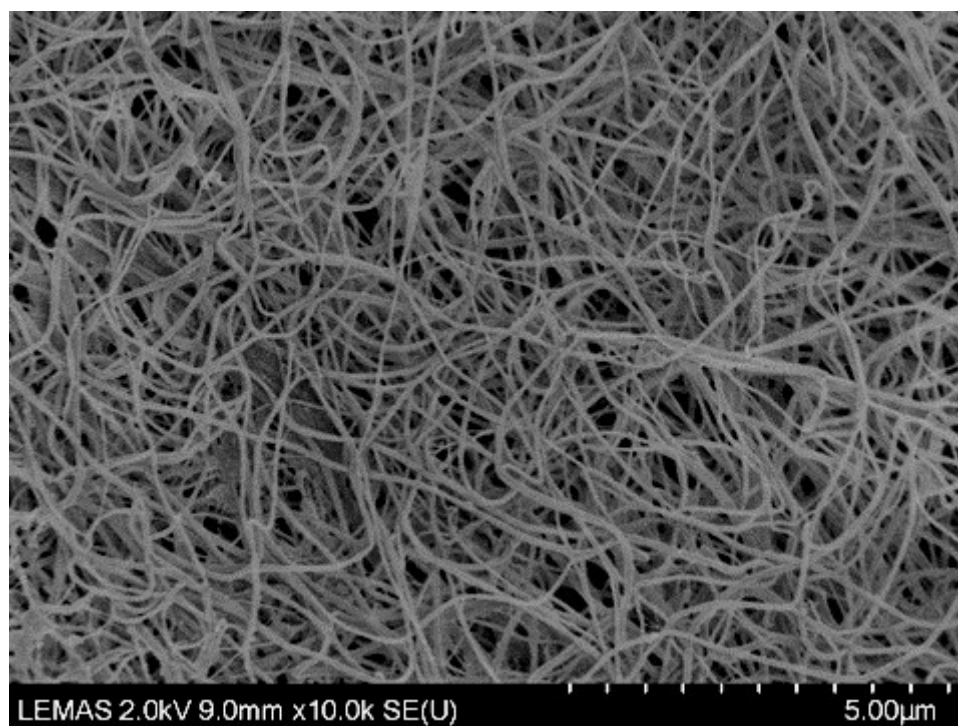

**Figure S35. Representative image from SEM experiments. Controls, no zinc.** The image was viewed and photographed at  $\times 10,000$  magnification using a SU8230 SEM.

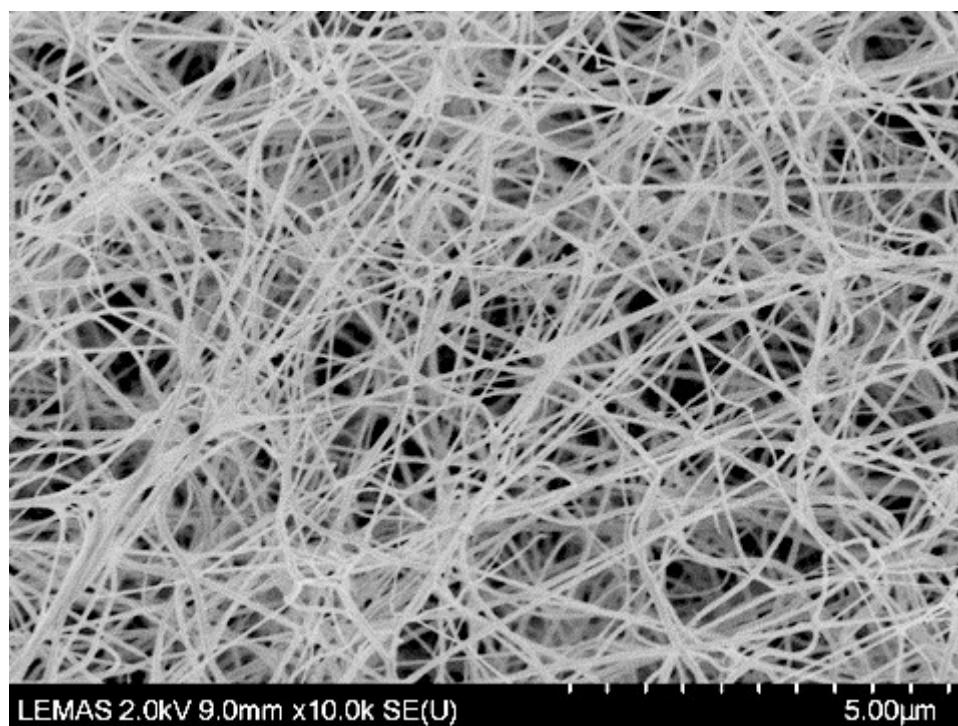

**Figure S36. Representative image from SEM experiments. Controls, 50  $\mu\text{M}$  zinc.** The image was viewed and photographed at  $\times 10,000$  magnification using a SU8230 SEM.

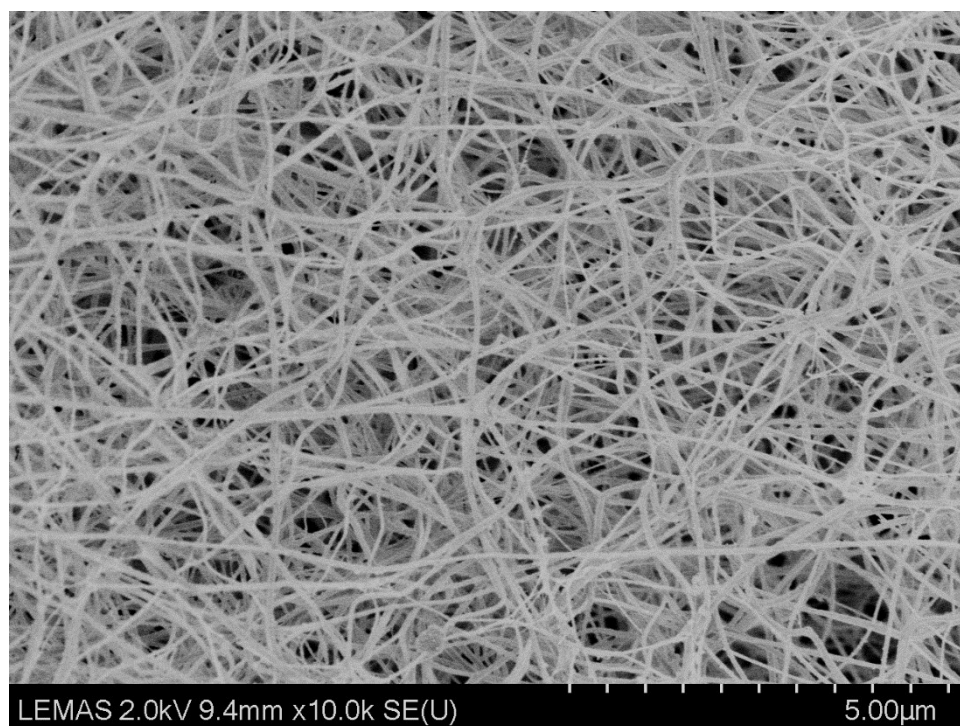

**Figure S37. Representative image from SEM experiments. T2DM, no zinc.** The image was viewed and photographed at  $\times 10,000$  magnification using a SU8230 SEM.

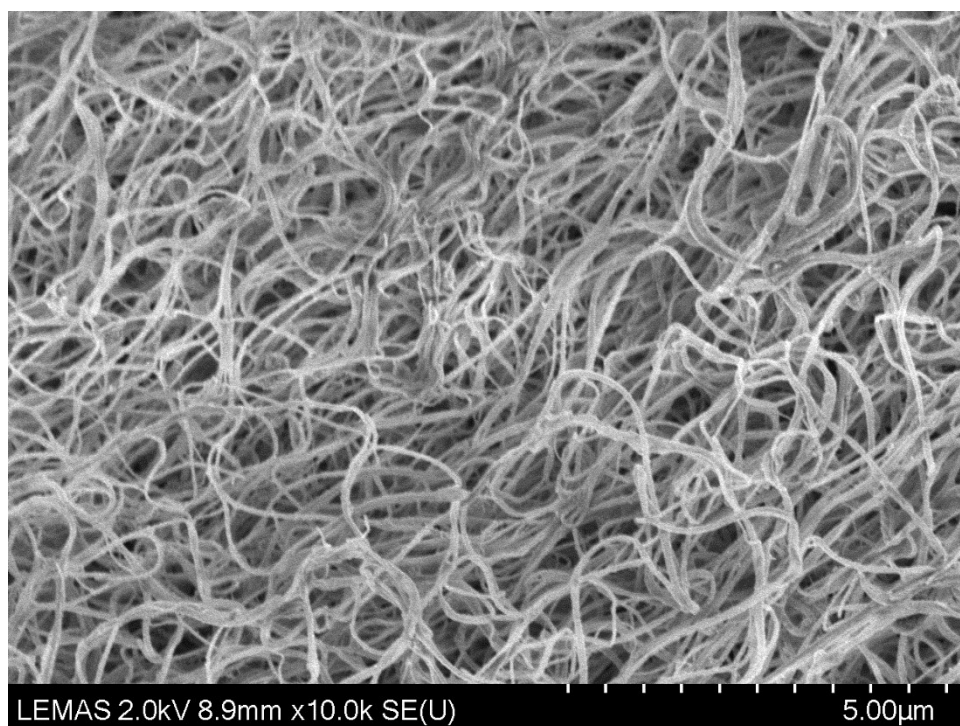

**Figure S38. Representative image from SEM experiments. T2DM, 50  $\mu$ M zinc.** The image was viewed and photographed at  $\times 10,000$  magnification using a SU8230 SEM.

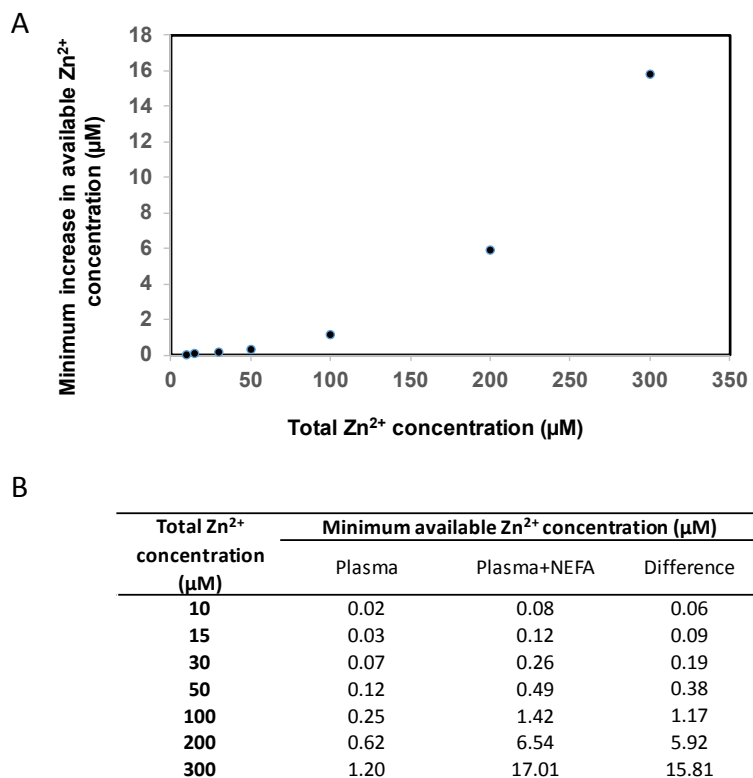

**Figure S39. Minimum increase in available  $\text{Zn}^{2+}$  concentration upon addition of 4 mol. eq. of myristate to 600 mM HSA, in dependence on total  $\text{Zn}^{2+}$  concentration.** Speciation calculations are based on a reduction to 16.3% binding capacity of site A, and also included 150  $\mu\text{M}$  citrate (typical endogenous concentration). These estimates highlight that during platelet activation, the presence of NEFAs might result in sizeable changes of available  $\text{Zn}^{2+}$  in plasma.
